# Supplementary material
Source: PubMed Central journal article supplement (PMC2711447)
Supplement: NIHMS112789-supplement-Tab_1.pdf [file NIHMS112789-supplement-Tab_1.pdf]

**SUPPLEMENTAL TABLE 1: Unique pY Peptides**

| PeptideSequence                          | Charge |        |        | Description                                                                       |
|------------------------------------------|--------|--------|--------|-----------------------------------------------------------------------------------|
|                                          | State  | XCorr  | DelCN  |                                                                                   |
| K.AAVFEEIDTY*ERR.S                       | 2      | 3.1032 | 0.3207 | HYPOTHETICAL PROTEIN FLJ21128.                                                    |
| K.AELSYRGPVSGTEPEPVY*SMEAADYR.E          | 3      | 4.716  | 0.1592 | CTTN PROTEIN.                                                                     |
| K.AELSYRGPVSGTEPEPVYSMEAADY*R.E          | 3      | 3.9653 | 0.2839 | SRC SUBSTRATE CORTACTIN.                                                          |
| K.AISSDMY*FGR.Q                          | 2      | 3.0458 | 0.1953 | ADP-RIBOSYLATION FACTOR GTPASE-ACTIVATING PROTEIN 3.                              |
| K.AKLTDPKEDIY*DEPEGLAPVPPQGLY*DLPREP.K.D | 3      | 3.7438 | 0.2639 | SPLICE ISOFORM 1 OF DOCKING PROTEIN 1.                                            |
| K.ALGADDSY*Y*TAR.S                       | 2      | 3.6696 | 0.2565 | TRUNCATED ZAP KINASE.                                                             |
| K.ALGADDSY*YTAR.S                        | 2      | 3.5524 | 0.3073 | TYROSINE-PROTEIN KINASE ZAP-70.                                                   |
| K.ALGADDSY*Y*TAR.S                       | 2      | 3.8023 | 0.3091 | TRUNCATED ZAP KINASE.                                                             |
| K.ALNGAEPNY*HSLPSAR.T                    | 2      | 4.2045 | 0.456  | FLJ20625 PROTEIN.                                                                 |
| K.ALY*STAMESIQGEAR.R                     | 2      | 4.8989 | 0.4332 | 68 KDA TYPE I PHOSPHATIDYLINOSITOL-4-PHOSPHATE 5-KINASE ALPHA.                    |
| K.APEPHVEEDDDDELDSKLN*Y*KPPPQK.S         | 3      | 4.4697 | 0.4584 | RHO GDP-DISSOCIATION INHIBITOR 2.                                                 |
| K.AQIWDTAGQERY*R.A                       | 2      | 2.449  | 0.1772 | RAS-RELATED PROTEIN RAB-11B.                                                      |
| K.ATGDETGAKVERADGY*EPPVQESV.-            | 2      | 3.0022 | 0.1508 | RPS3A PROTEIN.                                                                    |
| K.ATQFVY*SYGR.G                          | 2      | 2.5725 | 0.1322 | NUCLEAR TRANSCRIPTION FACTOR NFX2.                                                |
| K.ATQFVYSY*GR.G                          | 2      | 2.2325 | 0.1171 | SIMILAR TO TRANSCRIPTIONAL REPRESSOR NF-X1.                                       |
| K.AVTKDEDEWKELEQKEVDY*SGLR.V             | 3      | 3.3818 | 0.1295 | HYPOTHETICAL PROTEIN.                                                             |
| K.AVY*TQDCPLAAK.A                        | 2      | 3.1595 | 0.1345 | ALANYL-TRNA SYNTHETASE.                                                           |
| K.DFNLPEY*DLNVEER.L                      | 2      | 4.0318 | 0.2808 | SPLICE ISOFORM 3 OF LAP2 PROTEIN.                                                 |
| K.DGTSFGGEY*GGWYK.A                      | 2      | 2.7899 | 0.1714 | SPLICE ISOFORM G OF KINESIN LIGHT CHAIN 1.                                        |
| K.DKMAEAY*SEIGMK.G                       | 2      | 3.4379 | 0.2509 | SPLICE ISOFORM CD-3-ZETA OF T-CELL SURFACE GLYCOPROTEIN CD3 ZETA CHAIN PRECURSOR. |
| K.DKMAEAY*SEIGMKGER.R                    | 3      | 3.6903 | 0.336  | SPLICE ISOFORM CD-3-ZETA OF T-CELL SURFACE GLYCOPROTEIN CD3 ZETA CHAIN PRECURSOR. |
| K.DKVTIADDY*SDPFDKNDLK.S                 | 3      | 3.8607 | 0.1281 | SHB.                                                                              |
| K.DSSGWSSSKDKDAY*SSFGSR.S                | 3      | 4.4413 | 0.3316 | DEAD-BOX PROTEIN 3, X-CHROMOSOMAL.                                                |
| K.DTAIY*QKDEALHVKNKAVK.Q                 | 3      | 4.4518 | 0.3074 | MICROTUBULE-ASSOCIATED PROTEIN 1A.                                                |
| K.DTY*DALHMQALPPR.-                      | 3      | 3.5444 | 0.193  | SPLICE ISOFORM CD-3-ZETA OF T-CELL SURFACE GLYCOPROTEIN CD3 ZETA CHAIN PRECURSOR. |
| K.EFSVNNQLQLY*QEK.C                      | 2      | 3.5343 | 0.3123 | 1-PHOSPHATIDYLINOSITOL-4,5-BISPHOSPHATE PHOSPHODIESTERASE GAMMA 2.                |
| K.EISEASENIY*SDVR.G                      | 2      | 3.3786 | 0.2792 | TRANSCRIPTION FACTOR ELYS.                                                        |
| K.ENPGDFDFSGAEISGNY*TK.G                 | 2      | 5.016  | 0.4514 | NUDC DOMAIN CONTAINING 2.                                                         |
| K.ERPPVPNPDPY*EPIR.K                     | 2      | 2.7387 | 0.1822 | T-CELL SURFACE GLYCOPROTEIN CD3 EPSILON CHAIN PRECURSOR.                          |
| K.ERPPVPNPDPY*EPIRK.G                    | 3      | 4.0906 | 0.2331 | T-CELL SURFACE GLYCOPROTEIN CD3 EPSILON CHAIN PRECURSOR.                          |
| K.ERWEQGGADY*MGADSFNKR.K                 | 3      | 4.0965 | 0.1793 | SPLICE ISOFORM GN-1S OF GLYCOGENIN-1.                                             |
| K.ESESVSKEEKEQNY*DLTEVSESMK.A            | 3      | 3.6208 | 0.3906 | SGT1 PROTEIN.                                                                     |
| K.EVY*ELLDSPGK.V                         | 2      | 2.4065 | 0.1686 | MULTIFUNCTIONAL PROTEIN ADE2.                                                     |

**SUPPLEMENTAL TABLE 1: Unique pY Peptides**

| PeptideSequence                 | Charge |        |        | Description                                                            |
|---------------------------------|--------|--------|--------|------------------------------------------------------------------------|
|                                 | State  | XCorr  | DelCN  |                                                                        |
| K.FFDANYDGKDY*DPVAAR.Q          | 3      | 4.9704 | 0.3355 | MICROTUBULE-ASSOCIATED PROTEIN RP/EB FAMILY MEMBER 1.                  |
| K.FVETSPGLDPNASVY*QPLKK.-       | 3      | 3.649  | 0.1256 | HYPOTHETICAL PROTEIN FLJ10747.                                         |
| K.FVKERTEIELSY*AKQLR.N          | 2      | 2.7335 | 0.1332 | 16 KDA PROTEIN.                                                        |
| K.FYDANYDGKEY*DPVEAR.Q          | 3      | 4.506  | 0.3711 | SPLICE ISOFORM 2 OF MICROTUBULE-ASSOCIATED PROTEIN RP/EB FAMILY MEMBER |
| K.GAAPNVVYTY*TGKR.I             | 2      | 2.5602 | 0.2995 | CPSF6 PROTEIN.                                                         |
| K.GAMAATY*SALNR.N               | 2      | 3.0702 | 0.2676 | RIBOSOMAL PROTEIN S6 KINASE ALPHA 3.                                   |
| K.GFGGQY*GIQK.D                 | 2      | 2.8642 | 0.1102 | HEMATOPOIETIC LINEAGE CELL SPECIFIC PROTEIN.                           |
| K.GFY*DKDSSGWSSSKDKDAY*SSFSGR.S | 3      | 4.0801 | 0.2268 | DEAD-BOX PROTEIN 3, X-CHROMOSOMAL.                                     |
| K.GFYDKDSSGWSSSKDKDAY*SSFSGR.S  | 3      | 4.582  | 0.3022 | DEAD-BOX PROTEIN 3, X-CHROMOSOMAL.                                     |
| K.GHDGLY*QGLSTATK.D             | 2      | 4.3263 | 0.34   | CD3Z ANTIGEN, ZETA POLYPEPTIDE.                                        |
| K.GIPVETDSEEQPY*LEMDLSSPQTR.Y   | 2      | 3.9342 | 0.3931 | SPLICE ISOFORM 3 OF CASPASE-8 PRECURSOR.                               |
| K.GLIVY*CVTSPK.K                | 2      | 2.9251 | 0.1993 | SPLICE ISOFORM 1 OF RAP GUANINE NUCLEOTIDE EXCHANGE FACTOR 6.          |
| K.GPNGVY*DFSQAHNAK.D            | 2      | 3.9999 | 0.3766 | SPLICE ISOFORM 1 OF MELANOMA-ASSOCIATED ANTIGEN D1.                    |
| K.GQESEY*GNITYPPAMK.N           | 2      | 3.7778 | 0.3387 | 70 KDA SHP-1L PROTEIN.                                                 |
| K.GQKY*FDSGDYNMAK.A             | 3      | 4.0381 | 0.2684 | ENDOSULFINE ALPHA.                                                     |
| K.GQKYFDSGDY*NMAK.A             | 2      | 3.8392 | 0.3261 | CAMP-REGULATED PHOSPHOPROTEIN 19.                                      |
| K.GY*NDDYEESYFTTR.T             | 2      | 4.0143 | 0.2522 | EMERIN.                                                                |
| K.GY*SDEIYVVPDDSQNR.I           | 2      | 3.0457 | 0.307  | RHO-GTPASE-ACTIVATING PROTEIN 5.                                       |
| K.GY*YSPYSVSGSGTAGSR.T          | 2      | 3.3729 | 0.2779 | PLECTIN 1.                                                             |
| K.GYNDDY*YEESYFTTR.T            | 2      | 3.8257 | 0.1214 | EMERIN.                                                                |
| K.GYNDDY*EESYFTTR.T             | 2      | 4.5155 | 0.111  | EMERIN.                                                                |
| K.GYNDDYEEESY*FTTR.T            | 2      | 3.1008 | 0.1797 | EMERIN.                                                                |
| K.GYSDEIY*VVPDDSQNR.I           | 2      | 3.418  | 0.1827 | RHO-GTPASE-ACTIVATING PROTEIN 5.                                       |
| K.GYY*SPYSVSGSGTAGSR.T          | 2      | 3.9219 | 0.3598 | PLECTIN 7.                                                             |
| K.GYYSPY*SVSGSGTAGSR.T          | 2      | 4.7761 | 0.2865 | SPLICE ISOFORM 3 OF PLECTIN 1.                                         |
| K.HFNVNTDY*QNPVR.S              | 2      | 4.5726 | 0.2862 | TUDOR DOMAIN CONTAINING PROTEIN 3.                                     |
| K.HFSGLEEAVY*R.N                | 2      | 3.1168 | 0.3181 | T-COMPLEX PROTEIN 1, THETA SUBUNIT.                                    |
| K.HGDEIY*IAPSGVQKER.I           | 3      | 3.8049 | 0.3192 | CGI-29 PROTEIN.                                                        |
| K.HKENEEDY*GTCSSSVQY*TPVYK.L    | 3      | 5.8119 | 0.1935 | HYPOTHETICAL PROTEIN FLJ20054.                                         |
| K.HKENEEDY*GTCSSSVQYTPVY*K.L    | 3      | 4.6872 | 0.1683 | HYPOTHETICAL PROTEIN FLJ20054.                                         |
| K.HQDQAVVFGVDDNQDY*NRPVINEK.H   | 3      | 5.0908 | 0.3451 | KARP-1-BINDING PROTEIN.                                                |
| K.ICDPY*AWLEDPDSEQTK.A          | 2      | 2.3462 | 0.222  | PROLYL ENDOPEPTIDASE.                                                  |
| K.IDSIPHLNNSLPLVDPSVY*GYGVQK.R  | 3      | 5.2739 | 0.111  | SPLICE ISOFORM 1 OF FAR UPSTREAM ELEMENT BINDING PROTEIN 3.            |
| K.IDSIPHLNNSLPLVDPSVYGY*GVQK.R  | 3      | 4.6886 | 0.1983 | SPLICE ISOFORM 1 OF FAR UPSTREAM ELEMENT BINDING PROTEIN 3.            |
| K.IEKIGEGTY*GVVYK.G             | 2      | 3.129  | 0.2461 | HYPOTHETICAL PROTEIN DKFZP686L20222.                                   |
| K.IEKIGEGTY*GVVYKGR.H           | 3      | 4.2154 | 0.4333 | HYPOTHETICAL PROTEIN DKFZP686L20222.                                   |
| K.IGEGTY*GVVYK.A                | 2      | 3.2176 | 0.2906 | CELL DIVISION PROTEIN KINASE 2.                                        |

**SUPPLEMENTAL TABLE 1: Unique pY Peptides**

| PeptideSequence                      | Charge |        |        | Description                                                              |
|--------------------------------------|--------|--------|--------|--------------------------------------------------------------------------|
|                                      | State  | XCorr  | DelCN  |                                                                          |
| K.IGEGTY*GVVYKGR.H                   | 2      | 3.7825 | 0.1744 | HYPOTHETICAL PROTEIN DKFZP686L20222.                                     |
| K.IGEGTYGVVY*KGR.H                   | 2      | 3.0381 | 0.1322 | HYPOTHETICAL PROTEIN DKFZP686L20222.                                     |
| K.IIEENITSAAPSNDQDGEY*CPEVK.L        | 3      | 4.026  | 0.4235 | SFRS PROTEIN KINASE 2 ISOFORM A .                                        |
| K.ILY*SQCGDVMR.A                     | 2      | 2.9523 | 0.2646 | MYOSIN LIGHT CHAIN ALKALI, SMOOTH-MUSCLE ISOFORM.                        |
| K.INEELESQY*QQSMDSK.L                | 2      | 5.4014 | 0.4237 | SMALL ACIDIC PROTEIN.                                                    |
| K.IRNLDNNGGFY*ISPR.I                 | 2      | 4.0303 | 0.2606 | SPLICE ISOFORM SHORT OF PROTO-ONCOGENE TYROSINE-PROTEIN KINASE LCK.      |
| K.KATQFVY*SYGR.G                     | 2      | 3.2069 | 0.1557 | NUCLEAR TRANSCRIPTION FACTOR NFX2.                                       |
| K.KATQFVYSY*GR.G                     | 2      | 2.7355 | 0.2201 | SIMILAR TO TRANSCRIPTIONAL REPRESSOR NF-X1.                              |
| K.KEDALLY*QSK.G                      | 2      | 2.7983 | 0.1459 | EMERIN.                                                                  |
| K.KELTY*QNTDLSEIKEEEQVK.S            | 3      | 5.6376 | 0.2785 | TRANSCRIPTION REPRESSOR.                                                 |
| K.KFFDANYDGKDY*DPVAAR.Q              | 3      | 3.3095 | 0.1908 | MICROTUBULE-ASSOCIATED PROTEIN RP/EB FAMILY MEMBER 1.                    |
| K.KFYDANYDGKEY*DPVEAR.Q              | 3      | 3.9742 | 0.2003 | SPLICE ISOFORM 1 OF MICROTUBULE-ASSOCIATED PROTEIN RP/EBFAMILY MEMBER 2. |
| K.KITSSSAIY*DNPNIKPIPKPENQQR.I       | 3      | 4.6272 | 0.1414 | MRNA DECAPPING ENZYME 1B.                                                |
| K.KKSPATPQAKPDGVTATAADEEEDEY*SGGLC.- | 3      | 4.805  | 0.4728 | GAMMA-SOLUBLE NSF ATTACHMENT PROTEIN.                                    |
| K.KLAEGSAY*EEVPTSMY*SENDISNSIK.N     | 3      | 4.9584 | 0.2806 | PHOSPHOLIPASE C GAMMA 1 ISOFORM A .                                      |
| K.KLAEGSAY*EEVPTSMYSENDISNSIK.N      | 3      | 5.2015 | 0.4128 | 1-PHOSPHATIDYLINOSITOL-4,5-BISPHOSPHATE PHOSPHODIESTERASE GAMMA 1.       |
| K.KLAEGSAYEEVPTSMY*SENDISNSIK.N      | 3      | 4.957  | 0.3247 | 1-PHOSPHATIDYLINOSITOL-4,5-BISPHOSPHATE PHOSPHODIESTERASE GAMMA 1.       |
| K.KLKEESRDEESPY*ATSLYHS.-            | 3      | 4.1226 | 0.1551 | HYPOTHETICAL PROTEIN MGC35274.                                           |
| K.KLKEESRDEESPYATSLY*HS.-            | 3      | 3.4548 | 0.1391 | MGC35274 PROTEIN.                                                        |
| K.KSPATPQAKPDGVTATAADEEEDEY*SGGLC.-  | 3      | 6.4642 | 0.514  | GAMMA-SOLUBLE NSF ATTACHMENT PROTEIN.                                    |
| K.LAEGSAY*EEVPTSMYSENDISNSIK.N       | 3      | 4.892  | 0.456  | PHOSPHOLIPASE C GAMMA 1 ISOFORM A .                                      |
| K.LAEGSAYEEVPTSMY*SENDISNSIK.N       | 3      | 4.5113 | 0.2108 | 1-PHOSPHATIDYLINOSITOL-4,5-BISPHOSPHATE PHOSPHODIESTERASE GAMMA 1.       |
| K.LAQLQEGQDLY*SR.L                   | 2      | 3.7446 | 0.2815 | OTTHUMP00000038912.                                                      |
| K.LCDFGSASHVADNDITPY*LVSR.F          | 3      | 5.6939 | 0.2919 | SERINE/THREONINE-PROTEIN KINASE PRP4 HOMOLOG.                            |
| K.LGHPEALSAGTGSPQPPSFTY*AQQR.E       | 3      | 4.8003 | 0.3223 | ZYX PROTEIN.                                                             |
| K.LISDKIGSLGLGTGEDDDY*VDDFNSTSHR.S   | 3      | 5.2699 | 0.3939 | FGFR1 ONCOGENE PARTNER (FRAGMENT).                                       |
| K.LKADGLIY*CLK.E                     | 2      | 3.3496 | 0.2827 | TYROSINE-PROTEIN KINASE ZAP-70.                                          |
| K.LKEESRDEESPY*ATSLYHS.-             | 3      | 4.4354 | 0.2456 | MGC35274 PROTEIN.                                                        |
| K.LKEESRDEESPYATSLY*HS.-             | 3      | 4.0511 | 0.1157 | MGC35274 PROTEIN.                                                        |
| K.LKHKENEEDY*GTCSSVQY*TPVYK.L        | 3      | 4.0002 | 0.1731 | HYPOTHETICAL PROTEIN FLJ20054.                                           |
| K.LKHKENEEDY*GTCSSVQYTPVY*K.L        | 3      | 3.3076 | 0.1416 | HYPOTHETICAL PROTEIN FLJ20054.                                           |
| K.LMLSTSEY*SQSPK.M                   | 2      | 3.2097 | 0.1898 | HYPOTHETICAL PROTEIN DKFZP686B146.                                       |

**SUPPLEMENTAL TABLE 1: Unique pY Peptides**

| PeptideSequence                   | Charge |        |        | Description                                                                       |
|-----------------------------------|--------|--------|--------|-----------------------------------------------------------------------------------|
|                                   | State  | XCorr  | DelCN  |                                                                                   |
| K.LMNEDPMY*SMYAK.L                | 2      | 2.9202 | 0.1639 | STAM.                                                                             |
| K.LQDEANY*HLYGSR.M                | 2      | 3.8759 | 0.2918 | RECEPTOR-INTERACTING SERINE/THREONINE-PROTEIN KINASE 2.                           |
| K.LQDEANYHLY*GSR.M                | 2      | 3.8725 | 0.2578 | RECEPTOR-INTERACTING SERINE/THREONINE-PROTEIN KINASE 2.                           |
| K.LQLDNQY*AVLENQK.S               | 2      | 4.7966 | 0.321  | 14 KDA PROTEIN.                                                                   |
| K.LRGPLPYSGQSSEVSTPSSLYMEY*EGGR.Y | 3      | 4.1043 | 0.2364 | KIAA0226 PROTEIN (FRAGMENT).                                                      |
| K.LRLEEEALY*AAQR.E                | 2      | 3.301  | 0.1395 | HYPOTHETICAL PROTEIN DKFZP686P0859.                                               |
| K.LSPTEPKNY*GSY*STQASAAAATAELLK.K | 3      | 4.0603 | 0.184  | 35 KDA PROTEIN.                                                                   |
| K.LTGIKHELQANCY*EEVKDR.C          | 3      | 4.5476 | 0.2549 | COFILIN, NON-MUSCLE ISOFORM.                                                      |
| K.LTLRPPSLAAPY*APVQSWQHQPCK.L     | 3      | 4.053  | 0.1414 | ANKYRIN REPEAT AND SAM DOMAIN-CONTAINING PROTEIN 1.                               |
| K.LVNEAPVY*SVYSK.L                | 2      | 2.8133 | 0.1245 | SIGNAL TRANSDUCING ADAPTOR MOLECULE 2A.                                           |
| K.LVNEAPVYSVY*SK.L                | 2      | 3.3461 | 0.2961 | SIGNAL TRANSDUCING ADAPTOR MOLECULE 2A.                                           |
| K.LVTEMGTY*ATQSALSSSRPTKK.E       | 3      | 3.7315 | 0.2135 | COATOMER BETA SUBUNIT.                                                            |
| K.MAEAY*SEIGMK.G                  | 2      | 3.7347 | 0.3199 | CD3Z ANTIGEN, ZETA POLYPEPTIDE.                                                   |
| K.MAEAY*SEIGMKGER.R               | 2      | 4.3448 | 0.3247 | SPLICE ISOFORM CD-3-ZETA OF T-CELL SURFACE GLYCOPROTEIN CD3 ZETA CHAIN PRECURSOR. |
| K.MATDEENVY*GLEENAQSR.Q           | 2      | 5.1814 | 0.3177 | GTPASE, IMAP FAMILY MEMBER 1.                                                     |
| K.MENY*ELIHSSR.V                  | 2      | 3.5657 | 0.1675 | NISCHARIN.                                                                        |
| K.MQEATPSAQATNETQMCY*ASLDHSVK.G   | 3      | 3.6927 | 0.199  | T-CELL RECEPTOR INTERACTING MOLECULE.                                             |
| K.MVVESAY*EVIK.L                  | 2      | 3.1049 | 0.166  | L-LACTATE DEHYDROGENASE B CHAIN.                                                  |
| K.NAEDCLY*ELPENIR.V               | 2      | 5.0106 | 0.3555 | HSPC220.                                                                          |
| K.NGSEADIDEGLY*SR.Q               | 2      | 4.673  | 0.3893 | UBIQUITIN-ACTIVATING ENZYME E1 (FRAGMENT).                                        |
| K.NLYPSSSPY*TR.N                  | 2      | 2.7308 | 0.2642 | SGT1B PROTEIN.                                                                    |
| K.NPQEGLY*NELQK.D                 | 2      | 2.7797 | 0.1049 | SPLICE ISOFORM CD-3-ZETA OF T-CELL SURFACE GLYCOPROTEIN CD3 ZETA CHAIN PRECURSOR. |
| K.NTDY*TELHQNTDLIY*QTGPK.S        | 3      | 5.3164 | 0.2999 | SPLICE ISOFORM 2 OF GOLGI AUTOANTIGEN, GOLGIN SUBFAMILY A MEMBER 5.               |
| K.NTDYTELHQNTDLIY*QTGPK.S         | 3      | 4.4568 | 0.105  | SPLICE ISOFORM 1 OF GOLGI AUTOANTIGEN, GOLGIN SUBFAMILY A MEMBER 5.               |
| K.NVALLSPLY*HSPAR.R               | 2      | 2.6529 | 0.2131 | ELAV-LIKE PROTEIN 1.                                                              |
| K.NY*GSYSTQASAAAATAELLK.K         | 2      | 5.1813 | 0.4509 | SCAMP3 PROTEIN (FRAGMENT).                                                        |
| K.NYGSY*STQASAAAATAELLK.K         | 2      | 5.6959 | 0.1127 | SPLICE ISOFORM 2 OF SECRETORY CARRIER-ASSOCIATED MEMBRANE PROTEIN 3.              |
| K.QATTNVY*QVQTGSEY*TDTSNHSSLK.R   | 3      | 3.4113 | 0.2325 | SPLICE ISOFORM 3 OF ARF GTPASE-ACTIVATING PROTEIN GIT2.                           |
| K.QATTNVY*QVQTGSEYTDTSNHSSLK.R    | 3      | 3.3969 | 0.212  | SPLICE ISOFORM 8 OF ARF GTPASE-ACTIVATING PROTEIN GIT2.                           |
| K.QDLAY*ERQYEQQTYQVIVEVIK.N       | 3      | 3.5576 | 0.1645 | DJ1014D13.1 PROTEIN.                                                              |
| K.QDLAYERQY*EQQTYQVIVEVIK.N       | 3      | 4.092  | 0.1306 | DJ1014D13.1 PROTEIN.                                                              |
| K.QKDGTSFGEY*GGWYK.A              | 2      | 2.8167 | 0.2685 | SPLICE ISOFORM S OF KINESIN LIGHT CHAIN 1.                                        |

**SUPPLEMENTAL TABLE 1: Unique pY Peptides**

| PeptideSequence                       | Charge |        |        | Description                                                                                                        |
|---------------------------------------|--------|--------|--------|--------------------------------------------------------------------------------------------------------------------|
|                                       | State  | XCorr  | DelCN  |                                                                                                                    |
| K.QQPTQFINPETPGY*VGFANLPNQVHR.K       | 3      | 4.3798 | 0.2968 | SEPTIN 2.                                                                                                          |
| K.QTETEMLY*GSAPR.T                    | 2      | 2.3932 | 0.1221 | PROTEIN REGULATING CYTOKINESIS 1.                                                                                  |
| K.REEPEALY*AAVNK.K                    | 2      | 3.3069 | 0.1826 | INTERSECTIN 2 (SH3 DOMAIN-CONTAINING PROTEIN 1B) (SH3P18) (SH3P18-LIKE WASP ASSOCIATED PROTEIN). SPLICE ISOFORM 2. |
| K.RLEENDDDAY*LNSPWADNTALKR.H          | 3      | 6.0541 | 0.3138 | PROTEIN C21ORF59.                                                                                                  |
| K.RPMASEVPY*ASGMPIKK.I                | 3      | 3.6813 | 0.1701 | 68 KDA TYPE I PHOSPHATIDYLINOSITOL-4-PHOSPHATE 5-KINASE ALPHA.                                                     |
| K.RVGFQYEGTY*K.W                      | 2      | 2.7377 | 0.1131 | SPLICE ISOFORM LONG OF GLUCOSE-6-PHOSPHATE 1-DEHYDROGENASE.                                                        |
| K.SAVKNEEY*FMFPEPK.T                  | 3      | 4.2116 | 0.118  | MATERNAL EMBRYONIC LEUCINE ZIPPER KINASE.                                                                          |
| K.SAVTTVVNPKY*EGK.-                   | 2      | 3.0425 | 0.142  | SPLICE ISOFORM BETA-1A OF INTEGRIN BETA-1 PRECURSOR.                                                               |
| K.SEVDETY*ALPATK.I                    | 2      | 2.9224 | 0.1951 | HOST CELL FACTOR 2.                                                                                                |
| K.SGQSLTVPESTY*TSIQGDPQR.S            | 2      | 4.6521 | 0.3711 | HYPOTHETICAL PROTEIN FLJ20673.                                                                                     |
| K.SHY*ADVDPENQNFLESNLGK.K             | 3      | 3.7727 | 0.1508 | PUTATIVE 40-9-1 PROTEIN.                                                                                           |
| K.SLEDPY*SQQIR.L                      | 2      | 2.9663 | 0.2687 | HYPOTHETICAL PROTEIN FLJ10736.                                                                                     |
| K.SLHPWY*GITPTSSPK.T                  | 3      | 3.8916 | 0.1936 | MOLECULE INTERACTING WITH RAB13.                                                                                   |
| K.SLSHLPLHSSKEDAY*DGVTSENMR.N         | 3      | 4.3104 | 0.4137 | HYPOTHETICAL PROTEIN FLJ11273.                                                                                     |
| K.SLY*DEVAAQGEVVR.K                   | 2      | 3.0969 | 0.2183 | HYPOTHETICAL PROTEIN DKFZP313B047.                                                                                 |
| K.SLY*DEVAAQGEVVRK.L                  | 2      | 2.6977 | 0.2689 | HYPOTHETICAL PROTEIN DKFZP313B047.                                                                                 |
| K.SNETNGY*LDSAQAGPAAGPGAPGTAAGR.A     | 3      | 5.6972 | 0.3806 | NEUTRAL AMINO ACID TRANSPORTER A.                                                                                  |
| K.SPGALETPSAAGSQGNTASQKKEGPY*SEPSK.R  | 3      | 4.4436 | 0.2937 | SPLICE ISOFORM B OF A-KINASE ANCHOR PROTEIN 2.                                                                     |
| K.SPGALETPSAAGSQGNTASQKKEGPY*SEPSKR.G | 3      | 3.5842 | 0.1841 | SPLICE ISOFORM B OF A-KINASE ANCHOR PROTEIN 2.                                                                     |
| K.SQASGPEPELY*ASVCAQTR.R              | 3      | 3.4092 | 0.1097 | SIT PROTEIN PRECURSOR.                                                                                             |
| K.SQASKPAY*GNSPYWTN.-                 | 2      | 2.6164 | 0.1392 | 112 KDA PROTEIN.                                                                                                   |
| K.SQASKPAYGNSPY*WTN.-                 | 2      | 3.9943 | 0.345  | 112 KDA PROTEIN.                                                                                                   |
| K.SQDPNPQY*SPIIK.Q                    | 2      | 4.2263 | 0.3326 | SPLICE ISOFORM 3 OF SH2 DOMAIN PROTEIN 2A.                                                                         |
| K.SQGLSPLY*HNQSQGLLSQLQGQSK.D         | 3      | 4.7343 | 0.3913 | EUKARYOTIC TRANSLATION INITIATION FACTOR 4 GAMMA 2.                                                                |
| K.SREEDPTLTEEEISAMY*SSVNKPGQLVNK.S    | 3      | 4.7879 | 0.3037 | HYPOTHETICAL PROTEIN FLJ20673.                                                                                     |
| K.SSSLEMPY*NTPQLSPATTPANKK.N          | 3      | 4.517  | 0.3677 | DKFZP434C212 PROTEIN .                                                                                             |
| K.SSYHVEGTGY*DTYLR.D                  | 2      | 2.8743 | 0.1467 | HYPOTHETICAL PROTEIN DKFZP686D10123.                                                                               |
| K.TASGDY*IDSSWELR.V                   | 2      | 4.328  | 0.3411 | SPLICE ISOFORM 2 OF UNC-112 RELATED PROTEIN 2.                                                                     |
| K.TGAPQYGSY*GTAPVNLNIK.T              | 2      | 2.4065 | 0.2598 | HYPOTHETICAL PROTEIN DKFZP586K0717.                                                                                |
| K.TGVAGEDMQDNSGTY*GKIWEGSSK.C         | 3      | 4.2009 | 0.2658 | PROTEIN KINASE C, DELTA TYPE.                                                                                      |
| K.TITY*EAAQTVK.G                      | 2      | 3.158  | 0.1877 | SPLICE ISOFORM 4 OF PROTEIN 4.1.                                                                                   |
| K.TKEVY*ELLDSPGK.V                    | 2      | 2.212  | 0.1725 | MULTIFUNCTIONAL PROTEIN ADE2.                                                                                      |
| K.TLEPVKPPTPNDY*MTSPAR.L              | 3      | 3.4526 | 0.1668 | SPLICE ISOFORM 8 OF ABL-INTERACTOR 1.                                                                              |
| K.TNNAQNGHLEDDY*Y*SPHGMLANGSR.G       | 3      | 3.6831 | 0.2334 | PREDICTED: PUTATIVE ANKYRIN-REPEAT CONTAINING PROTEIN .                                                            |
| K.TNNAQNGHLEDDYY*SPHGMLANGSR.G        | 3      | 4.4647 | 0.3216 | PREDICTED: PUTATIVE ANKYRIN-REPEAT CONTAINING PROTEIN .                                                            |
| K.TPQGPPEIY*SDTQFPSLQSTAK.H           | 2      | 3.9835 | 0.1972 | HYPOTHETICAL PROTEIN.                                                                                              |

**SUPPLEMENTAL TABLE 1: Unique pY Peptides**

| PeptideSequence                | Charge |        |        | Description                                                                |
|--------------------------------|--------|--------|--------|----------------------------------------------------------------------------|
|                                | State  | XCorr  | DelCN  |                                                                            |
| K.TPSSNTLDDY*MSCFR.T           | 2      | 4.1383 | 0.329  | DUAL SPECIFICITY PROTEIN KINASE TTK.                                       |
| K.TTAVEIDY*DSLK.L              | 2      | 3.3317 | 0.1482 | SPLICE ISOFORM FYB-120 OF FYN-BINDING PROTEIN.                             |
| K.TTEDEVHICHNQDGY*SYPSR.Q      | 3      | 4.4351 | 0.123  | LOW-DENSITY LIPOPROTEIN RECEPTOR PRECURSOR.                                |
| K.TTEDEVHICHNQDGYSY*PSR.Q      | 3      | 4.8134 | 0.3063 | LOW-DENSITY LIPOPROTEIN RECEPTOR PRECURSOR.                                |
| K.TTEMETIY*DLGTK.M             | 2      | 2.6429 | 0.2836 | RUVB-LIKE 2.                                                               |
| K.TTGKMENY*ELIHSSR.V           | 3      | 3.7335 | 0.3042 | NISCHARIN.                                                                 |
| K.TTYDSSLSSY*TVPLEKDNSEEFRQR.E | 3      | 3.8485 | 0.2609 | SPLICE ISOFORM 3 OF ATAXIN-2-LIKE PROTEIN.                                 |
| K.TYSECEDGTY*SPEISWHHR.K       | 3      | 4.2613 | 0.3591 | PHOSPHATIDYLSERINE SYNTHASE 1.                                             |
| K.VEKIGEGTY*GVVYK.A            | 2      | 3.5105 | 0.1721 | CELL DIVISION PROTEIN KINASE 2.                                            |
| K.VERADGY*EPPVQESV.-           | 2      | 3.6629 | 0.4163 | 40S RIBOSOMAL PROTEIN S3A.                                                 |
| K.VGINY*QPPTVVPGGDLAK.V        | 2      | 3.4819 | 0.1892 | SPLICE ISOFORM 1 OF TUBULIN ALPHA-2 CHAIN.                                 |
| K.VHQLY*ETIQR.W                | 2      | 2.7298 | 0.2867 | 45 KDA PROTEIN.                                                            |
| K.VLAQQGEY*SEAIPILR.A          | 2      | 3.363  | 0.1716 | FK506-BINDING PROTEIN 8 .                                                  |
| K.VLEY*EMTQFDRR.G              | 2      | 2.7986 | 0.2127 | PREDICTED: KIAA1223 PROTEIN .                                              |
| K.VQENDGKPPVNY*EEDAR.S         | 3      | 4.6825 | 0.3408 | PROTO-ONCOGENE TYROSINE-PROTEIN KINASE FER.                                |
| K.VQNATTKGPNGVY*DFSQAHNAK.D    | 3      | 4.8279 | 0.2619 | SPLICE ISOFORM 2 OF MELANOMA-ASSOCIATED ANTIGEN D1.                        |
| K.WDTGENPIY*K.S                | 2      | 3.2313 | 0.2557 | SPLICE ISOFORM BETA-1A OF INTEGRIN BETA-1 PRECURSOR.                       |
| K.WDTGENPIY*KSAVTTVVNPK.Y      | 3      | 4.6161 | 0.308  | SPLICE ISOFORM BETA-1A OF INTEGRIN BETA-1 PRECURSOR.                       |
| K.WDTGENPIY*KSAVTTVVNPKY*EGK.- | 3      | 5.3505 | 0.2944 | SPLICE ISOFORM BETA-1A OF INTEGRIN BETA-1 PRECURSOR.                       |
| K.WIDATSGIY*NSEK.S             | 2      | 3.2776 | 0.2988 | LIM DOMAIN ONLY 7 (FRAGMENT).                                              |
| K.WPTVDASY*YGGR.G              | 2      | 3.4201 | 0.1002 | SPLICE ISOFORM 4 OF ANTHRAX TOXIN RECEPTOR 2 PRECURSOR.                    |
| K.WPTVDASY*GGR.G               | 2      | 3.0774 | 0.2255 | SPLICE ISOFORM 1 OF ANTHRAX TOXIN RECEPTOR 2 PRECURSOR.                    |
| K.Y*AGSALQYEDVSTAVQNLQK.A      | 3      | 4.3    | 0.2117 | PROTEIN C6ORF55.                                                           |
| K.YAGSALQY*EDVSTAVQNLQK.A      | 2      | 4.9994 | 0.1637 | PROTEIN C6ORF55.                                                           |
| K.YAVFKNPQNFY*LDNR.G           | 3      | 3.7325 | 0.2151 | AMYLOID BETA (A4) PROTEIN-BINDING, FAMILY B, MEMBER 1 INTERACTING PROTEIN. |
| K.YDEDAKRPY*FTVDEAEAR.Q        | 3      | 4.3994 | 0.2937 | SPLICE ISOFORM DELTA OF POLIOVIRUS RECEPTOR RELATED PROTEIN PRECURSOR.     |
| K.YFDSDY*NMAK.A                | 2      | 3.6704 | 0.3598 | SPLICE ISOFORM 2 OF ALPHA-ENDOSULFINE.                                     |
| K.YGLFKEENPY*AR.F              | 2      | 3.3854 | 0.3275 | PITUITARY TUMOR-TRANSFORMING GENE 1 PROTEIN-INTERACTING PROTEIN PRECURSOR. |
| K.YQYAIDEY*YR.M                | 2      | 2.8689 | 0.2363 | HYPOTHETICAL PROTEIN DKFZP686J1254.                                        |
| K.YQYAIDEY*YR.M                | 2      | 3.1304 | 0.2025 | HYPOTHETICAL PROTEIN DKFZP686J1254.                                        |
| K.YTISQEAY*DQRQDTR.S           | 2      | 3.2447 | 0.2462 | TUBULIN-SPECIFIC CHAPERONE B.                                              |
| L.ELILKGLNEY*LEK.K             | 2      | 3.859  | 0.1688 | CILIARY DYNEIN HEAVY CHAIN 7.                                              |
| R.AADQFDIY*SSQSK.Y             | 2      | 4.2223 | 0.2939 | HYPOTHETICAL PROTEIN FLJ37562.                                             |
| R.AAEVVMCY*TSLQLRPPQGR.I       | 3      | 4.3675 | 0.3162 | SIT PROTEIN PRECURSOR.                                                     |

**SUPPLEMENTAL TABLE 1: Unique pY Peptides**

| PeptideSequence                          | Charge | State | XCorr  | DelCN  | Description                                                        |
|------------------------------------------|--------|-------|--------|--------|--------------------------------------------------------------------|
| R.AASTAPSSSTSPAASSAGLIY*IDPSNLR.R        |        | 3     | 4.5481 | 0.2804 | UBIQUITIN--PROTEIN LIGASE EDD.                                     |
| R.ADGY*EPPVQESV.-                        |        | 2     | 3.2218 | 0.1623 | PREDICTED: SIMILAR TO RIBOSOMAL PROTEIN S3A.                       |
| R.ADQQY*ECVAEIGEGAYGK.V                  |        | 2     | 5.3531 | 0.4192 | CELL DIVISION PROTEIN KINASE 6.                                    |
| R.AEIQNAEDY*NEIFQPK.N                    |        | 3     | 4.1353 | 0.1338 | KATANIN P80 WD40-CONTAINING SUBUNIT B1.                            |
| R.AGATASKEPPLY*YGVCPVYEDVPAR.N           |        | 3     | 4.6026 | 0.2785 | KIAA0692 PROTEIN (FRAGMENT).                                       |
| R.AGATASKEPPLYY*GVCPVY*EDVPARNER.I       |        | 3     | 4.9341 | 0.2134 | KIAA0692 PROTEIN (FRAGMENT).                                       |
| R.AGATASKEPPLYY*GVCPVYEDVPAR.N           |        | 3     | 4.4283 | 0.2762 | KIAA0692 PROTEIN (FRAGMENT).                                       |
| R.AGATASKEPPLYYGVCPVY*EDVPAR.N           |        | 3     | 4.7235 | 0.2928 | KIAA0692 PROTEIN (FRAGMENT).                                       |
| R.AGATASKEPPLYYGVCPVY*EDVPARNER.I        |        | 3     | 4.8187 | 0.3631 | KIAA0692 PROTEIN (FRAGMENT).                                       |
| R.APKEEADY*EDDFLEY*DQEHIR.F              |        | 3     | 4.8572 | 0.254  | DICER1 .                                                           |
| R.APKEEADY*EDDFLEYDQEHIR.F               |        | 3     | 5.5407 | 0.3286 | DICER1 .                                                           |
| R.AQIPEGDY*LSYR.E                        |        | 2     | 2.3902 | 0.2173 | SPLICE ISOFORM 6 OF LAP2 PROTEIN.                                  |
| R.AQSQEDGDY*INANYIR.G                    |        | 2     | 4.8809 | 0.3476 | TYROSINE-PROTEIN PHOSPHATASE, NON-RECEPTOR TYPE 7.                 |
| R.AQSQEDGDYINANY*IR.G                    |        | 2     | 3.1844 | 0.1116 | TYROSINE-PROTEIN PHOSPHATASE, NON-RECEPTOR TYPE 7.                 |
| R.AQSYPDNHQEFSDY*DNPIFEK.F               |        | 3     | 3.8146 | 0.237  | HYPOTHETICAL PROTEIN FLJ14439.                                     |
| R.ARQY*TSPEEIDAQLQAEKQK.A                |        | 3     | 5.8236 | 0.1858 | 28 KDA HEAT- AND ACID-STABLE PHOSPHOPROTEIN.                       |
| R.ASFPDQAY*ANSQPAAS.-                    |        | 2     | 3.1786 | 0.3178 | SIT PROTEIN PRECURSOR.                                             |
| R.ASLVSKSY*SEPVVVK.T                     |        | 2     | 2.846  | 0.2381 | THYMUS HIGH MOBILITY GROUP BOX PROTEIN TOX.                        |
| R.AVLY*ADY*RAPGPAR.F                     |        | 2     | 3.2157 | 0.2544 | KIN OF IRRE LIKE.                                                  |
| R.AVLY*ADYRAPGPAR.F                      |        | 2     | 2.6506 | 0.1596 | SPLICE ISOFORM 2 OF KIN OF IRRE-LIKE PROTEIN 1 PRECURSOR.          |
| R.AVLYADY*RAPGPAR.F                      |        | 2     | 3.3165 | 0.3272 | SPLICE ISOFORM 1 OF KIN OF IRRE-LIKE PROTEIN 1 PRECURSOR.          |
| R.AVSPQSTKPMASITY*AAVAR.H                |        | 3     | 3.8693 | 0.1389 | LEUKOCYTE-ASSOCIATED IG-LIKE RECEPTOR 1 ISOFORM B PRECURSOR .      |
| R.AVSPQSTKPMASITY*AAVARH.-               |        | 3     | 3.5513 | 0.2024 | LAIR1 PROTEIN.                                                     |
| R.AYQHGGVTGLSQY*.-                       |        | 2     | 2.7535 | 0.1431 | SPLICE ISOFORM 1 OF REGULATOR OF NONSENSE TRANSCRIPTS 1.           |
| R.CASCPY*LGMPAFKPGEK.V                   |        | 3     | 3.4493 | 0.1583 | SPLICE ISOFORM 3 OF ANAMORSIN.                                     |
| R.DDAQY*SHLGGNWAR.N                      |        | 2     | 2.7004 | 0.2743 | T-CELL SURFACE GLYCOPROTEIN CD3 DELTA CHAIN PRECURSOR.             |
| R.DGSLASNPY*SGDLTK.F                     |        | 2     | 3.5703 | 0.2742 | UBIQUITIN ASSOCIATED PROTEIN 2-LIKE.                               |
| R.DINSLY*DVS.R.M                         |        | 2     | 3.0918 | 0.107  | 1-PHOSPHATIDYLINOSITOL-4,5-BISPHOSPHATE PHOSPHODIESTERASE GAMMA 2. |
| R.DKNSAACVVY*EDMSHSR.C                   |        | 3     | 4.3489 | 0.2569 | T-CELL ANTIGEN CD7 PRECURSOR.                                      |
| R.DKPSVEPVEEY*DY*EDLKESNSVSNHQLSGFDQAR.L |        | 3     | 4.1591 | 0.1628 | OTTHUMP00000017253.                                                |
| R.DLIHQDEDEEEEGQRFY*AGGSER.S             |        | 3     | 3.56   | 0.1864 | SPLICE ISOFORM 1 OF NSFL1 COFACTOR P47.                            |
| R.DLNY*CFSGMSDHR.Y                       |        | 2     | 3.6888 | 0.325  | 50 KDA PROTEIN.                                                    |
| R.DLQY*ITVSKHEELSSGDSLSPDPWKR.D          |        | 3     | 5.1832 | 0.2979 | MYELOID\LYMPHOID OR MIXED-LINEAGE LEUKEMIA (FRAGMENT).             |
| R.DLSY*CLSGMYDHR.Y                       |        | 2     | 2.6607 | 0.163  | HETEROGENEOUS NUCLEAR RIBONUCLEOPROTEIN F .                        |
| R.DLY*SGLNQR.R                           |        | 2     | 3.01   | 0.1536 | T-CELL SURFACE GLYCOPROTEIN CD3 EPSILON CHAIN PRECURSOR.           |
| R.DNLAQQSFNMEQANY*TIQSLKDTK.T            |        | 3     | 4.1087 | 0.3305 | SNF7 DOMAIN CONTAINING PROTEIN 2.                                  |

**SUPPLEMENTAL TABLE 1: Unique pY Peptides**

| PeptideSequence                             | Charge |        |        | Description                                                                                                                               |
|---------------------------------------------|--------|--------|--------|-------------------------------------------------------------------------------------------------------------------------------------------|
|                                             | State  | XCorr  | DelCN  |                                                                                                                                           |
| R.DRDDAQY*SHLGGNWAR.N                       | 3      | 3.6367 | 0.2504 | T-CELL SURFACE GLYCOPROTEIN CD3 DELTA CHAIN PRECURSOR.                                                                                    |
| R.DRQAFSMY*EPGSALKPFGGPPGDELTR.L            | 3      | 4.9684 | 0.3745 | SPLICE ISOFORM 1 OF ARF GTPASE-ACTIVATING PROTEIN GIT1.                                                                                   |
| R.DSAY*QSITHYRPVSASR.S                      | 3      | 3.333  | 0.2646 | EMERIN.                                                                                                                                   |
| R.DSQGTY*SSRDAELQDQEFQGR.D                  | 3      | 3.5241 | 0.1386 | HYPOTHETICAL PROTEIN FLJ42913.                                                                                                            |
| R.DVYLSRDDGY*STKDSYSSR.D                    | 3      | 3.9876 | 0.2531 | HETEROGENEOUS NUCLEAR RIBONUCLEOPROTEIN G.                                                                                                |
| R.DYNPNY*SDSISPFNK.S                        | 2      | 2.9357 | 0.1309 | CLIP-ASSOCIATING PROTEIN 2 .                                                                                                              |
| R.EATKGFYDKDSSGWSSSKDKDAY*SSFGRS.S          | 3      | 3.342  | 0.1205 | DEAD-BOX PROTEIN 3, X-CHROMOSOMAL.                                                                                                        |
| R.EGHMMDALY*AQVK.K                          | 2      | 2.5742 | 0.1263 | SPLICE ISOFORM 7 OF PARTITIONING-DEFECTIVE 3 HOMOLOG.                                                                                     |
| R.EKQSDDEVY*APGLDISSLK.Q                    | 3      | 4.3989 | 0.2177 | SPLICING FACTOR 3A, SUBUNIT 1, 120KDA ISOFORM 2 .                                                                                         |
| R.ELFDDPSY*VNVQNLDK.A                       | 2      | 4.9416 | 0.301  | SHC TRANSFORMING PROTEIN.                                                                                                                 |
| R.ENDTITIY*STINHSK.E                        | 2      | 2.7991 | 0.1732 | SLAM FAMILY MEMBER 6 PRECURSOR.                                                                                                           |
| R.EPPPAY*EPPAPAPLPPPSAPSLQPSR.K             | 3      | 3.5733 | 0.2383 | SPLICE ISOFORM 1 OF SECRETORY CARRIER-ASSOCIATED MEMBRANE PROTEIN 3.                                                                      |
| R.EQLY*STILSHQCQR.M                         | 2      | 2.9651 | 0.389  | G18.1B PROTEIN.                                                                                                                           |
| R.ERVTPEGY*EVVTVFPK.-                       | 3      | 4.037  | 0.3496 | PDZ AND LIM DOMAIN PROTEIN 1.                                                                                                             |
| R.FAQPGSFEY*EYAMR.W                         | 2      | 4.1101 | 0.1535 | NONO PROTEIN.                                                                                                                             |
| R.FAQPGSFEY*AMR.W                           | 2      | 3.4791 | 0.3308 | NONO PROTEIN.                                                                                                                             |
| R.FAVPTY*AAK.Q                              | 2      | 2.6127 | 0.1368 | SPLICE ISOFORM 1 OF ADAM 9 PRECURSOR.                                                                                                     |
| R.FHTSTY*DLPGPEGAGPFEASQPADSAPVATSGK.V      | 3      | 4.6241 | 0.179  | MICROTUBULE-ASSOCIATED PROTEIN 1A.                                                                                                        |
| R.FLENGSQEDLLHGNPGSTY*LASNSTSAPNWK.S        | 3      | 4.7919 | 0.3307 | SPLICE ISOFORM 3 OF ZINC FINGER CCCH TYPE ANTIVIRAL PROTEIN 1.                                                                            |
| R.FMTTAMY*DAR.E                             | 2      | 3.1075 | 0.3663 | HYPOTHETICAL PROTEIN FLJ43809.                                                                                                            |
| R.FQDVGPQAPVGSVY*QK.T                       | 2      | 5.7142 | 0.4204 | SPLICE ISOFORM 2 OF DREBRIN-LIKE PROTEIN.                                                                                                 |
| R.FQKENPGDFDGSAGISGNY*TK.G                  | 3      | 5.2339 | 0.2837 | NUDC DOMAIN CONTAINING 2.                                                                                                                 |
| R.FSPDSQY*IDNR.S                            | 2      | 3.165  | 0.2983 | SPLICE ISOFORM 2 OF PARTITIONING-DEFECTIVE 3 HOMOLOG.                                                                                     |
| R.FSPPEPGDTPDEPDALY*VACQGQPK.G              | 3      | 4.5385 | 0.2278 | 565 KDA PROTEIN.                                                                                                                          |
| R.FSTQGMGTFNPADY*SDSTSTDVCGTK.L             | 3      | 3.3869 | 0.3413 | 117 KDA PROTEIN.                                                                                                                          |
| R.FSTY*TSKDENKLSEASGGR.A                    | 3      | 3.8025 | 0.1794 | LEREPO4 PROTEIN.                                                                                                                          |
| R.FTEY*SMTSSVMR.R                           | 2      | 3.2715 | 0.3218 | C6ORF93 PROTEIN.                                                                                                                          |
| R.FVLDDQY*TSSTGKFPVK.W                      | 2      | 4.5195 | 0.2944 | TYROSINE-PROTEIN KINASE ITK/TSK.                                                                                                          |
| R.GASQAGMTGY*GMPR.Q                         | 2      | 3.7281 | 0.3695 | TRANSGELIN 2.                                                                                                                             |
| R.GEPNVSY*ICSR.Y                            | 2      | 3.3844 | 0.3036 | SPLICE ISOFORM 1 OF GLYCOGEN SYNTHASE KINASE-3 BETA.                                                                                      |
| R.GFGSFRFSGNQGGAGPSQSGGGTGGSVY*TEDNDDDLG.-  | 3      | 3.797  | 0.1681 | TRANSITIONAL ENDOPLASMIC RETICULUM ATPASE.                                                                                                |
| R.GFGSFRFSGNQGGAGPSQSGGGTGGSVYTEDNDDDLG*G.- | 3      | 5.7553 | 0.3948 | TRANSITIONAL ENDOPLASMIC RETICULUM ATPASE.                                                                                                |
| R.GGHMDDGGY*SMNFMSSSR.G                     | 3      | 3.5835 | 0.1077 | PREDICTED: SIMILAR TO HETEROGENEOUS NUCLEAR RIBONUCLEO-PROTEIN G (HNRNP G) (RNA BINDING MOTIF PROTEIN, X CHROMOSOME) (GLYCOPROTEIN P43) . |



**SUPPLEMENTAL TABLE 1: Unique pY Peptides**

| PeptideSequence                     | Charge |        |        | Description                                                                       |
|-------------------------------------|--------|--------|--------|-----------------------------------------------------------------------------------|
|                                     | State  | XCorr  | DelCN  |                                                                                   |
| R.GHALY*VEPHGHGPSLSVQGLSR.A         | 3      | 3.334  | 0.3361 | SOLUTE CARRIER FAMILY 39 (ZINC TRANSPORTER), MEMBER 3, ISOFORM A.                 |
| R.GKGHDGLY*QGLSTATK.D               | 2      | 3.3735 | 0.4126 | SPLICE ISOFORM CD-3-ZETA OF T-CELL SURFACE GLYCOPROTEIN CD3 ZETA CHAIN PRECURSOR. |
| R.GLAHPPSY*SNPPVYHGNSPK.H           | 3      | 3.3375 | 0.1107 | PREDICTED: USP6 N-TERMINAL LIKE .                                                 |
| R.GLY*DGPVCEVSVTPK.T                | 2      | 4.1719 | 0.3625 | DIHYDROPYRIMIDINASE RELATED PROTEIN-2.                                            |
| R.GPQSNY*GGPYPAAPTFGSQPGPPQLPPK.R   | 3      | 3.4653 | 0.1258 | PROTEIN TRANSPORT PROTEIN SEC24C.                                                 |
| R.GPVSGTEPEPVY*SMEAADYR.E           | 2      | 3.8652 | 0.3753 | CTTN PROTEIN.                                                                     |
| R.GQEGEY*AVPFDVAR.S                 | 2      | 4.1065 | 0.3681 | DOCKING PROTEIN 2 ISOFORM B .                                                     |
| R.GVGSPEPGPTAPY*LGR.S               | 2      | 2.8428 | 0.3791 | SPLICE ISOFORM 2 OF ZINC FINGER DHHC DOMAIN CONTAINING PROTEIN 5.                 |
| R.GYFEYIEENKY*SR.A                  | 2      | 2.6787 | 0.1844 | HETEROGENEOUS NUCLEAR RIBONUCLEOPROTEIN U, ISOFORM B.                             |
| R.HAIY*DKLDDGLIAPGVR.V              | 3      | 3.9211 | 0.2873 | DNA-DIRECTED RNA POLYMERASE II 140 KDA POLYPEPTIDE.                               |
| R.HEVTICNY*EASANPADHR.V             | 3      | 5.7308 | 0.4576 | AD039.                                                                            |
| R.HFTVVGDDY*HAWNINIK.K              | 3      | 4.4869 | 0.3299 | CATION CHANNEL, NON-LIGAND GATED FAMILY PROTEIN.                                  |
| R.HHEGGTPY*AEYGGWYK.A               | 2      | 2.8724 | 0.1201 | KINESIN-LIKE 8 ISOFORM B .                                                        |
| R.HHEGGTPYAEY*GGWYK.A               | 3      | 3.5989 | 0.1207 | KINESIN-LIKE PROTEIN 8.                                                           |
| R.HHEGGTPYAEYGGWY*K.A               | 2      | 2.9289 | 0.1748 | KINESIN-LIKE PROTEIN 8.                                                           |
| R.HIDLQFSY*APR.H                    | 2      | 3.5073 | 0.2736 | ZNF598 PROTEIN.                                                                   |
| R.HTDDEMTGY*VATR.W                  | 2      | 4.2853 | 0.4528 | MITOGEN-ACTIVATED PROTEIN KINASE 14 ISOFORM 2 .                                   |
| R.HTHLDDPIAEVEPTDSEPY*SCSK.S        | 3      | 3.9584 | 0.1472 | SPLICE ISOFORM 1 OF RAP GUANINE NUCLEOTIDE EXCHANGE FACTOR 6.                     |
| R.HVFGQPAKADQCY*EDVR.V              | 3      | 3.8014 | 0.2599 | CORONIN-1A.                                                                       |
| R.IADPEHDHTGFLTEY*VATR.W            | 3      | 4.5387 | 0.1739 | MITOGEN-ACTIVATED PROTEIN KINASE 3.                                               |
| R.IAPCPSQDSLY*SDPLDSTSAQAGEGVQR.K   | 3      | 5.2441 | 0.4471 | SPLICE ISOFORM 1 OF DOCKING PROTEIN 1.                                            |
| R.IDTLNSDGY*TPEPAR.I                | 2      | 4.6043 | 0.3355 | TYROSINE-PROTEIN KINASE ZAP-70.                                                   |
| R.IEEFVY*EKLDK.K                    | 2      | 3.4641 | 0.261  | SPLICE ISOFORM 2 OF SH3 DOMAIN GRB2-LIKE PROTEIN B1.                              |
| R.IIASLADRPY*EPPQKPPR.F             | 3      | 3.5548 | 0.1275 | ANKYRIN REPEAT AND SAM DOMAIN-CONTAINING PROTEIN 1.                               |
| R.IKEEMSKDQPDY*AMY*SR.I             | 3      | 4.0412 | 0.2197 | SPLICE ISOFORM 1 OF DEDICATOR OF CYTOKINESIS PROTEIN 2.                           |
| R.IKEEMSKDQPDY*AMYSR.I              | 3      | 4.2176 | 0.1296 | SPLICE ISOFORM 1 OF DEDICATOR OF CYTOKINESIS PROTEIN 2.                           |
| R.IKEEMSKDQPDYAMY*SR.I              | 3      | 4.3181 | 0.236  | SPLICE ISOFORM 1 OF DEDICATOR OF CYTOKINESIS PROTEIN 2.                           |
| R.IKSYDY*EAWAK.L                    | 3      | 3.6416 | 0.102  | HYPOTHETICAL PROTEIN FLJ21908.                                                    |
| R.IKSYDY*EAWAKLDVDR.I               | 3      | 3.7817 | 0.1289 | HYPOTHETICAL PROTEIN FLJ21908.                                                    |
| R.IPGPGTPVKY*SEVVLDSEPK.S           | 3      | 4.0079 | 0.104  | SIT PROTEIN PRECURSOR.                                                            |
| R.ISHSLY*SGIEGLDESPSR.N             | 2      | 4.007  | 0.3552 | SPLICE ISOFORM 3 OF PARTITIONING-DEFECTIVE 3 HOMOLOG.                             |
| R.ISTY*GLPAGGIQPHPQTK.N             | 3      | 3.4895 | 0.2424 | CD2-ASSOCIATED PROTEIN.                                                           |
| R.ITSPDKPRMPMDTSVY*ESPY*SDPEELK.D   | 3      | 3.7407 | 0.1431 | TYROSINE-PROTEIN KINASE ZAP-70.                                                   |
| R.ITSPDKPRMPMDTSVY*ESPY*SDPEELKDK.K | 3      | 3.5522 | 0.1713 | TYROSINE-PROTEIN KINASE ZAP-70.                                                   |

**SUPPLEMENTAL TABLE 1: Unique pY Peptides**

| PeptideSequence                   | Charge |        |        | Description                                                                                                  |
|-----------------------------------|--------|--------|--------|--------------------------------------------------------------------------------------------------------------|
|                                   | State  | XCorr  | DelCN  |                                                                                                              |
| R.IVQQY*HPSNNGEYQSSGPEDDFESCLR.N  | 3      | 5.6459 | 0.1439 | HYPOTHETICAL PROTEIN DKFZP686P0859.                                                                          |
| R.IVQQYHPSNNGEY*QSSGPEDDFESCLR.N  | 3      | 6.417  | 0.1202 | HYPOTHETICAL PROTEIN DKFZP686P0859.                                                                          |
| R.IYQY*IQSR.F                     | 2      | 2.7565 | 0.1223 | SPLICE ISOFORM 2 OF DUAL-SPECIFICITY TYROSINE-PHOSPHORYLATION REGULATED KINASE 1B.                           |
| R.KAPNASDFDQWEMETVY*SNSEVR.N      | 3      | 3.8815 | 0.1918 | SPLICE ISOFORM 1 OF CENTROSOMAL PROTEIN OF 110 KDA.                                                          |
| R.KAQSNPY*YNGPHLNLK.A             | 3      | 5.2108 | 0.1516 | SPLICE ISOFORM 4 OF LIM DOMAIN ONLY PROTEIN 7.                                                               |
| R.KAQSNPY*YNGPHLNLK.A             | 3      | 4.4879 | 0.2646 | SPLICE ISOFORM 1 OF LIM DOMAIN ONLY PROTEIN 7.                                                               |
| R.KEVKY*EAPQATDGLAGALDAR.Q        | 3      | 4.3294 | 0.2852 | TOM1 PROTEIN.                                                                                                |
| R.KFTY*LGSQDR.A                   | 2      | 2.9692 | 0.1498 | SPLICE ISOFORM 1 OF ZINC FINGER CCCH TYPE ANTIVIRAL PROTEIN 1.                                               |
| R.KGPDEAEESQY*DSGIESLR.S          | 2      | 5.0815 | 0.4246 | OTTHUMP00000016522.                                                                                          |
| R.KGTDELY*AVK.I                   | 2      | 2.6558 | 0.1614 | SPLICE ISOFORM BETA-I OF PROTEIN KINASE C, BETA TYPE.                                                        |
| R.KGTGLSSDY*R.I                   | 2      | 2.7569 | 0.2207 | SPLICE ISOFORM 5 OF ZINC FINGER CCCH TYPE ANTIVIRAL PROTEIN 1.                                               |
| R.KIIEENITSAAPSNDDQDGEY*CPEVK.L   | 3      | 5.4923 | 0.3338 | SFRS PROTEIN KINASE 2 ISOFORM A .                                                                            |
| R.KKY*NDDSDSYFTSSSYFDEPVELR.S     | 3      | 4.1159 | 0.1138 | ADP-RIBOSYLATION FACTOR GTPASE-ACTIVATING PROTEIN 3.                                                         |
| R.KKYNDDSDSY*FTSSSYFDEPVELR.S     | 3      | 5.0786 | 0.1896 | ADP-RIBOSYLATION FACTOR GTPASE-ACTIVATING PROTEIN 3.                                                         |
| R.KKYNDDSDSYFTSSSY*FDEPVELR.S     | 3      | 3.6218 | 0.1195 | ADP-RIBOSYLATION FACTOR GTPASE-ACTIVATING PROTEIN 3.                                                         |
| R.KLSPTPKNY*GSY*STQASAAAATAELLK.K | 3      | 5.2288 | 0.2838 | SPLICE ISOFORM 1 OF SECRETORY CARRIER-ASSOCIATED MEMBRANE PROTEIN 3.                                         |
| R.KMATDEENVY*GLEENAQSR.Q          | 2      | 4.1074 | 0.3657 | GTPASE, IMAP FAMILY MEMBER 1.                                                                                |
| R.KNPQEGLY*NELQK.D                | 2      | 3.7814 | 0.1285 | SPLICE ISOFORM CD-3-ZETA OF T-CELL SURFACE GLYCOPROTEIN CD3 ZETA CHAIN PRECURSOR.                            |
| R.KNPQEGLY*NELQKDK.M              | 3      | 5.1365 | 0.2349 | CD3Z ANTIGEN, ZETA POLYPEPTIDE.                                                                              |
| R.KNPQEGLY*NELQKDKMAEAY*SEIGMK.G  | 3      | 3.974  | 0.1613 | CD3Z ANTIGEN, ZETA POLYPEPTIDE.                                                                              |
| R.KQATTNVY*QVQTGSEY*TDTSNHSSLK.R  | 3      | 5.7513 | 0.3007 | SPLICE ISOFORM 10 OF ARF GTPASE-ACTIVATING PROTEIN GIT2.                                                     |
| R.KQATTNVY*QVQTGSEYTDTSNHSSLK.R   | 3      | 6.2863 | 0.342  | SPLICE ISOFORM 4 OF ARF GTPASE-ACTIVATING PROTEIN GIT2.                                                      |
| R.KQATTNVYQVQTGSEY*TDTSNHSSLK.R   | 3      | 5.1387 | 0.3646 | SPLICE ISOFORM 8 OF ARF GTPASE-ACTIVATING PROTEIN GIT2.                                                      |
| R.KRYDQDLCY*TDILFTEQER.G          | 3      | 3.4342 | 0.1368 | 116 KDA U5 SMALL NUCLEAR RIBONUCLEOPROTEIN COMPONENT.                                                        |
| R.KSELPQDVY*TIK.A                 | 2      | 3.0068 | 0.1991 | SPLICE ISOFORM DELTA-2 OF SERINE/THREONINE PROTEIN PHOSPHATASE 2A, 56 KDA REGULATORY SUBUNIT, DELTA ISOFORM. |
| R.KSWTSSSSLSDTY*EPNY*GTVKR.R      | 3      | 3.9497 | 0.2763 | SPLICE ISOFORM 3 OF RAP GUANINE NUCLEOTIDE EXCHANGE FACTOR 6.                                                |
| R.KTAQDTLY*VLPSPSPCPSPVLVR.K      | 3      | 3.8594 | 0.1664 | CALCIUM AND DAG-REGULATED GUANINE NUCLEOTIDE EXCHANGE FACTOR II.                                             |
| R.KTEDTY*FISSAGKPTPGTQGK.I        | 3      | 5.228  | 0.3264 | KIAA1212 .                                                                                                   |
| R.KTPQGPPEIY*SDTQFPSLQSTAK.H      | 3      | 5.4463 | 0.2878 | H41 PROTEIN.                                                                                                 |
| R.KTPQGPPEIY*SNTQFPSLQSTAK.H      | 2      | 2.988  | 0.1916 | 14 KDA PROTEIN.                                                                                              |
| R.KTVTY*EDPQAVGGLASALDNR.K        | 3      | 4.2191 | 0.1543 | 51 KDA PROTEIN.                                                                                              |
| R.KTVTY*EDPQAVGGLASALDNRK.Q       | 3      | 4.796  | 0.3172 | HYPOTHETICAL PROTEIN FLJ42340.                                                                               |

**SUPPLEMENTAL TABLE 1: Unique pY Peptides**

| PeptideSequence                    | Charge |        |        | Description                                                                      |
|------------------------------------|--------|--------|--------|----------------------------------------------------------------------------------|
|                                    | State  | XCorr  | DelCN  |                                                                                  |
| R.LAY*INPDLALEEK.N                 | 2      | 3.9246 | 0.2539 | 68 KDA PROTEIN.                                                                  |
| R.LAY*INPDLALEEKNK.G               | 3      | 3.4748 | 0.2161 | STRESS-INDUCED-PHOSPHOPROTEIN 1.                                                 |
| R.LAY*QELQIDR.K                    | 2      | 3.4565 | 0.1386 | HYPOTHETICAL PROTEIN FLJ14576.                                                   |
| R.LAY*VAPTIPR.R                    | 2      | 2.7794 | 0.175  | SPLICE ISOFORM 3 OF PROTEIN PHOSPHATASE 1 REGULATORY SUBUNIT 12A.                |
| R.LCNLEEGSPGSGTY*TR.H              | 2      | 4.5129 | 0.3063 | 3'-5' EXORIBONUCLEASE CSL4 HOMOLOG.                                              |
| R.LFQQIY*SDGSDEVK.R                | 2      | 3.0454 | 0.2151 | SUPPRESSOR OF G2 ALLELE OF SKP1 HOMOLOG.                                         |
| R.LFQQIY*SDGSDEVKR.A               | 2      | 4.1459 | 0.248  | SUPPRESSOR OF G2 ALLELE OF SKP1 HOMOLOG.                                         |
| R.LGAAPEEESAY*VAGEKR.Q             | 2      | 4.331  | 0.3292 | P47 PROTEIN ISOFORM C .                                                          |
| R.LGEY*EDVSR.V                     | 2      | 2.3333 | 0.1673 | TUBULIN-SPECIFIC CHAPERONE B.                                                    |
| R.LGEY*EDVSRVEK.Y                  | 2      | 3.6658 | 0.2306 | TUBULIN-SPECIFIC CHAPERONE B.                                                    |
| R.LGEY*EDVSRVEKY*TISQEAYDQR.Q      | 3      | 4.2561 | 0.4061 | TUBULIN-SPECIFIC CHAPERONE B.                                                    |
| R.LGEY*EDVSRVEKYTISQEAYDQR.Q       | 3      | 5.0574 | 0.3481 | TUBULIN-SPECIFIC CHAPERONE B.                                                    |
| R.LIEDNEY*TAR.Q                    | 2      | 2.7707 | 0.1034 | PRO3078.                                                                         |
| R.LKGMKDDDY*DDQLC.-                | 2      | 4.0707 | 0.352  | ARRESTIN BETA 2 ISOFORM 2 .                                                      |
| R.LLGSVDY*DGINDAIR.L               | 2      | 4.2649 | 0.405  | PHOSPHATIDYLINOSITOL-4-PHOSPHATE 3-KINASE C2 DOMAIN-CONTAINING BETA POLYPEPTIDE. |
| R.LLHSDY*MNMTPR.R                  | 2      | 3.5602 | 0.3494 | SPLICE ISOFORM 4 OF T-CELL-SPECIFIC SURFACE GLYCOPROTEIN CD28 PRECURSOR.         |
| R.LQKGQKY*FDSGDY*NMAK.A            | 3      | 3.4903 | 0.2198 | 13 KDA PROTEIN.                                                                  |
| R.LQKGQKY*FDSGDYNMAK.A             | 3      | 3.4709 | 0.2142 | CAMP-REGULATED PHOSPHOPROTEIN 19.                                                |
| R.LQNFSY*DQR.E                     | 2      | 2.2603 | 0.1116 | HYPOTHETICAL PROTEIN DKFZP667H197 (FRAGMENT).                                    |
| R.LSVKEDPSY*DSVR.R                 | 2      | 2.7025 | 0.1486 | SPLICE ISOFORM 1 OF FRIEND LEUKEMIA INTEGRATION 1 TRANSCRIPTION FACTOR.          |
| R.LVSSPCIVTSTY*GWTANMER.I          | 3      | 4.5877 | 0.4303 | HYPOTHETICAL PROTEIN DKFZP761K0511.                                              |
| R.MPWY*HSSLTR.E                    | 2      | 3.1649 | 0.2251 | TYROSINE-PROTEIN KINASE ZAP-70.                                                  |
| R.MQAYSNPGY*SSFPSPTGLEPCK.S        | 3      | 3.8606 | 0.2379 | RFFL PROTEIN.                                                                    |
| R.MRACY*Y*SLASKVEGPPGSTQKAEAAACA.- | 3      | 3.756  | 0.1681 | TYROSINE-PROTEIN KINASE ZAP-70.                                                  |
| R.MY*VDPSEINPSMPQR.T               | 2      | 3.8735 | 0.4313 | PHOSPHOLIPASE C, GAMMA 2 (PHOSPHATIDYLINOSITOL-SPECIFIC) .                       |
| R.NEEENIY*SVPHDSTQGK.I             | 2      | 4.8828 | 0.3761 | 173 KDA PROTEIN.                                                                 |
| R.NEEGKY*GY*VLR.S                  | 2      | 2.8303 | 0.1249 | SPLICE ISOFORM FYB-120 OF FYN-BINDING PROTEIN.                                   |
| R.NFRHPEIVGY*VVPGR.N               | 3      | 3.6236 | 0.1942 | SPLICE ISOFORM 2 OF DYNAMIN BINDING PROTEIN.                                     |
| R.NGDVSQFPY*VEFTGR.D               | 2      | 3.5856 | 0.4371 | HYPOTHETICAL PROTEIN FLJ11273.                                                   |
| R.NLDAQY*EMAR.S                    | 2      | 2.7832 | 0.21   | HYPOTHETICAL PROTEIN DKFZP686P16221.                                             |
| R.NLDNGGFY*ISPR.I                  | 2      | 3.6895 | 0.1498 | SPLICE ISOFORM SHORT OF PROTO-ONCOGENE TYROSINE-PROTEIN KINASE LCK.              |
| R.NLEY*VSVSPTNNTVY*ASVTHSNR.E      | 3      | 3.7071 | 0.1643 | SLAM FAMILY MEMBER 6 PRECURSOR.                                                  |

**SUPPLEMENTAL TABLE 1: Unique pY Peptides**

| PeptideSequence                                        | Charge |        |        | Description                                                               |
|--------------------------------------------------------|--------|--------|--------|---------------------------------------------------------------------------|
|                                                        | State  | XCorr  | DelCN  |                                                                           |
| R.NMGGPY*GGGNYGPGGSGGGYGGGR.S                          | 3      | 3.8974 | 0.2468 | 37 KDA PROTEIN.                                                           |
| R.NMGGPYGGGNY*GPGGSGGGYGGGR.S                          | 3      | 4.6041 | 0.1535 | SPLICE ISOFORM A2 OF HETEROGENEOUS NUCLEAR RIBONUCLEO-PROTEINS A2/B1.     |
| R.NPGFY*VEANPMPTFK.C                                   | 2      | 3.4564 | 0.3621 | PHOSPHOLIPASE C GAMMA 1 ISOFORM A .                                       |
| R.NPPQPVDWNNDY*CSSGGMQR.D                              | 3      | 5.2593 | 0.3099 | THYMUS HIGH MOBILITY GROUP BOX PROTEIN TOX.                               |
| R.NSNSY*GIPEPAHAY*AQPQTTTLPVAVSGSPGAAITPLPSTQNGPVFAK.A | 3      | 3.9104 | 0.3298 | CRK-LIKE PROTEIN.                                                         |
| R.NSNSY*GIPEPAHAYAQPQTTTLPVAVSGSPGAAITPLPSTQNGPVFAK.A  | 3      | 3.3374 | 0.1193 | CRK-LIKE PROTEIN.                                                         |
| R.NSNSYGIPEPAHAY*AQPQTTTLPVAVSGSPGAAITPLPSTQNGPVFAK.A  | 3      | 3.6236 | 0.1498 | CRK-LIKE PROTEIN.                                                         |
| R.NTPY*KTLEPVKPTVPNDY*MTSPAR.L                         | 3      | 4.0768 | 0.1654 | SPLICE ISOFORM 1 OF ABL-INTERACTOR 1.                                     |
| R.NVPPGLDEY*NPFSDSR.T                                  | 2      | 2.6058 | 0.2055 | SECRETORY CARRIER-ASSOCIATED MEMBRANE PROTEIN 1.                          |
| R.QDFDVDCY*AQR.R                                       | 2      | 2.5077 | 0.1596 | RAPGEF1 PROTEIN.                                                          |
| R.QGPGQSLSPENY*QTLPK.S                                 | 2      | 3.2529 | 0.2487 | PLEKHA7 PROTEIN.                                                          |
| R.QHPPADSSVTMEDMNEY*SNIEEFAEGSK.I                      | 3      | 3.5756 | 0.233  | JKTBP2.                                                                   |
| R.QLNGTY*AIAGGK.A                                      | 2      | 2.9083 | 0.312  | TYROSINE-PROTEIN KINASE ZAP-70.                                           |
| R.QLQEY*LAQ GK.A                                       | 2      | 2.4122 | 0.105  | HYPOTHETICAL PROTEIN FLJ90068.                                            |
| R.QTGGEEDGASGY*DAYWK.N                                 | 2      | 4.0053 | 0.2541 | ZINC FINGER PROTEIN 330.                                                  |
| R.QTGGEEDGASGYDAY*WK.N                                 | 2      | 2.9875 | 0.1922 | ZINC FINGER PROTEIN 330.                                                  |
| R.QTGSPGMIY*STR.Y                                      | 2      | 2.5892 | 0.2193 | SPLICE ISOFORM 1 OF VOLTAGE-GATED POTASSIUM CHANNEL BETA-2 SUBUNIT.       |
| R.QTVTY*EDPQAVGGLASALDNRK.Q                            | 3      | 3.7425 | 0.1534 | TARGET OF MYB1-LIKE PROTEIN 2.                                            |
| R.QY*EQQTYQVIPEVIK.N                                   | 2      | 2.589  | 0.23   | EUKARYOTIC TRANSLATION INITIATION FACTOR 3 SUBUNIT 6 INTERACTING PROTEIN. |
| R.RAQIPEGDY*LSYR.E                                     | 3      | 4.1769 | 0.196  | SPLICE ISOFORM 4 OF LAP2 PROTEIN.                                         |
| R.RAQIPEGDYLSY*R.E                                     | 3      | 3.3583 | 0.1308 | SPLICE ISOFORM 4 OF LAP2 PROTEIN.                                         |
| R.RDNEVDGQDY*HFVVS.R.E                                 | 3      | 4.1921 | 0.2911 | DISCS, LARGE HOMOLOG 3.                                                   |
| R.REEY*DVLDKR.R                                        | 3      | 3.9443 | 0.2073 | HYPOTHETICAL PROTEIN FLJ46519.                                            |
| R.RHEVTICNY*EASANPADHR.V                               | 3      | 5.4695 | 0.2185 | AD039.                                                                    |
| R.RIDTLNSDGY*TPEPAR.I                                  | 2      | 5.7639 | 0.3485 | TYROSINE-PROTEIN KINASE ZAP-70.                                           |
| R.RISHSLY*SGIEGLDES.PSR.N                              | 3      | 4.3031 | 0.2069 | SPLICE ISOFORM 6 OF PARTITIONING-DEFECTIVE 3 HOMOLOG.                     |
| R.RKNPQEGLY*NELQK.D                                    | 3      | 4.5749 | 0.2039 | CD3Z ANTIGEN, ZETA POLYPEPTIDE.                                           |
| R.RKNPQEGLY*NELQKDK.M                                  | 3      | 4.9131 | 0.2471 | CD3Z ANTIGEN, ZETA POLYPEPTIDE.                                           |
| R.RNEGVVGGEDY*EEVD.R.Y                                 | 3      | 5.2803 | 0.4154 | HYPOTHETICAL PROTEIN DKFZP762F135.                                        |
| R.RNEGVVGGEDY*EEVD.R.Y.SR.Q                            | 3      | 4.3912 | 0.183  | HYPOTHETICAL PROTEIN DKFZP762F135.                                        |
| R.RNEGVVGGEDY*EEVD.R.Y.SR.Q                            | 3      | 5.0787 | 0.4059 | ZNF598 PROTEIN.                                                           |
| R.RPHGDIY*GINQALGATAK.V                                | 3      | 3.6484 | 0.1145 | DIACYLGLYCEROL KINASE, ALPHA.                                             |
| R.RPPSSSSSSASSY*TGRPIELDK.M                            | 3      | 4.4477 | 0.2999 | PROTEIN KINASE C, D2 TYPE.                                                |
| R.RPTFVPQWY*VQQMK.R                                    | 2      | 2.6478 | 0.1905 | SPLICE ISOFORM 5 OF ZINC FINGER CCCH TYPE ANTIVIRAL PROTEIN 1.            |

**SUPPLEMENTAL TABLE 1: Unique pY Peptides**

| PeptideSequence                        | Charge | State | XCorr  | DelCN  | Description                                                                                   |
|----------------------------------------|--------|-------|--------|--------|-----------------------------------------------------------------------------------------------|
| R.RPVDSY*DIPKTEEASSGFLPGDR.N           |        | 3     | 3.3544 | 0.2183 | SPLICE ISOFORM 1 OF LIM DOMAIN ONLY PROTEIN 7.                                                |
| R.RQEELNNQLFLY*DTHQNL.R                |        | 3     | 4.291  | 0.1428 | PHOSPHOLIPASE C, GAMMA 2 (PHOSPHATIDYLINOSITOL-SPECIFIC) .                                    |
| R.RQSGLY*DSQNPPTVNNCAQDR.E             |        | 3     | 4.1551 | 0.2815 | FORMIN BINDING PROTEIN 1.                                                                     |
| R.RRDEDMLY*SPELAQR.G                   |        | 3     | 4.0371 | 0.1169 | SH3 DOMAIN-BINDING PROTEIN SNP70.                                                             |
| R.RRQEELNNQLFLY*DTHQNL.R               |        | 3     | 4.1737 | 0.3896 | PHOSPHOLIPASE C, GAMMA 2 (PHOSPHATIDYLINOSITOL-SPECIFIC) .                                    |
| R.RRVDGMQY*YCS.-                       |        | 2     | 2.5127 | 0.1073 | CHROMOSOME 14 OPEN READING FRAME 130 .                                                        |
| R.RSDSASSEPVGIY*QGFEEK.T               |        | 3     | 4.11   | 0.1407 | PROTEIN KINASE C, DELTA.                                                                      |
| R.RTQTCTEGGDY*CLIPR.T                  |        | 2     | 4.2119 | 0.403  | NOVEL PROTEIN.                                                                                |
| R.RTQVIDDES DY*FASDSNQWLSK.L           |        | 3     | 4.536  | 0.3045 | ACTIVATING SIGNAL COINTEGRATOR 1.                                                             |
| R.RVDGMQY*YCS.-                        |        | 2     | 2.2142 | 0.2005 | PROTEIN C14ORF130.                                                                            |
| R.SADAPAY*QQGQNQLY*NELNLGR.R           |        | 3     | 4.6838 | 0.2311 | HYPOTHETICAL PROTEIN FLJ46519.                                                                |
| R.SADAPAY*QQGQNQLY*NELNLGR.R.E         |        | 3     | 3.6884 | 0.2194 | CD3Z ANTIGEN, ZETA POLYPEPTIDE.                                                               |
| R.SADAPAY*QQGQNQLY*NELNLGR.R           |        | 2     | 4.8371 | 0.3431 | CD3Z ANTIGEN, ZETA POLYPEPTIDE.                                                               |
| R.SADAPAY*QQGQNQLY*NELNLGR.R           |        | 3     | 5.1805 | 0.3474 | CD3Z ANTIGEN, ZETA POLYPEPTIDE.                                                               |
| R.SAEEAPLY*SKVTPR.A                    |        | 2     | 3.5738 | 0.2952 | PTPN18 PROTEIN.                                                                               |
| R.SDSASSEPVGIY*QGFEEK.K                |        | 2     | 3.8811 | 0.447  | PROTEIN KINASE C, DELTA.                                                                      |
| R.SDVDLY*QVR.T                         |        | 2     | 3.2261 | 0.1823 | SPLICE ISOFORM P27-S OF 26S PROTEASOME NON-ATPASE REGULATORY SUBUNIT 9.                       |
| R.SEAPNWATQDSGFY*.-                    |        | 2     | 3.2807 | 0.2383 | MAMMARY TUMOR INTEGRATION SITE 6.                                                             |
| R.SEY*DRGVNTFSPEGR.L                   |        | 3     | 3.778  | 0.2382 | PROTEASOME SUBUNIT ALPHA TYPE 5.                                                              |
| R.SGCRNPPQPVDWNNDY*CSSGGMQR.D          |        | 3     | 5.0583 | 0.3407 | THYMUS HIGH MOBILITY GROUP BOX PROTEIN TOX.                                                   |
| R.SGESVEEVPLY*GNLHY*LQTGR.L            |        | 3     | 3.929  | 0.1527 | SIT PROTEIN PRECURSOR.                                                                        |
| R.SGESVEEVPLY*GNLHYLQTGR.L             |        | 2     | 4.0976 | 0.2932 | SIT PROTEIN PRECURSOR.                                                                        |
| R.SGPLEACY*GELGQSR.M                   |        | 2     | 3.7071 | 0.3621 | CONSERVED HYPOTHETICAL PROTEIN.                                                               |
| R.SGSY*HVREESTY*LPLTSMQPTEAMGEEPSRAE.- |        | 3     | 4.6172 | 0.3524 | INTERCELLULAR ADHESION MOLECULE-3 PRECURSOR.                                                  |
| R.SGSY*SYLEER.K                        |        | 2     | 2.7377 | 0.1311 | SPLICE ISOFORM 3 OF PROTEIN PHOSPHATASE 1 REGULATORY SUBUNIT 12A.                             |
| R.SHNVAAGSY*EAPLPPGSFHGDFAYGTYR.S      |        | 3     | 3.8562 | 0.1945 | OTTHUMP00000022589.                                                                           |
| R.SLY*ASSPGGVY*ATR.S                   |        | 2     | 3.521  | 0.2647 | VIMENTIN.                                                                                     |
| R.SLY*ASSPGGVYATR.S                    |        | 2     | 3.681  | 0.2976 | VIMENTIN.                                                                                     |
| R.SLYASSPGGVY*ATR.S                    |        | 2     | 4.186  | 0.3684 | VIMENTIN.                                                                                     |
| R.SNSGLATY*SPPMGPVSR.K                 |        | 2     | 3.0594 | 0.1637 | SPLICE ISOFORM 2 OF NEUROFIBROMIN.                                                            |
| R.SPSSCNDLY*ATVK.D                     |        | 2     | 2.9582 | 0.4352 | HYPOTHETICAL PROTEIN FLJ20673.                                                                |
| R.SQELSGPASNGGISQTNTY*DAQYER.A         |        | 3     | 4.6266 | 0.4025 | NY-REN-25 ANTIGEN (FRAGMENT).                                                                 |
| R.SQHFFDTSVPLMDDGDDNTLY*HR.G           |        | 3     | 5.5057 | 0.3705 | 35 KDA PROTEIN.                                                                               |
| R.SQSHLPY*FTPKPPQDSAVIK.A              |        | 3     | 3.9889 | 0.2551 | PLECKSTRIN HOMOLOGY DOMAIN CONTAINING, FAMILY A (PHOSPHOINOSITIDE BINDING SPECIFIC) MEMBER 1. |

**SUPPLEMENTAL TABLE 1: Unique pY Peptides**

| PeptideSequence                            | Charge | State | XCorr  | DelCN  | Description                                                                                                                                                                                                      |
|--------------------------------------------|--------|-------|--------|--------|------------------------------------------------------------------------------------------------------------------------------------------------------------------------------------------------------------------|
| R.SQY*EALKEDWR.T                           |        | 2     | 2.9714 | 0.1825 | TRAF3-INTERACTING JNK-ACTIVATING MODULATOR.                                                                                                                                                                      |
| R.SRDY*NPYNYSISPFNK.S                      |        | 3     | 3.9244 | 0.155  | CLIP-ASSOCIATING PROTEIN 2 .                                                                                                                                                                                     |
| R.SRDYNPY*NYSISPFNK.S                      |        | 3     | 4.4921 | 0.1264 | CLIP-ASSOCIATING PROTEIN 2 .                                                                                                                                                                                     |
| R.SRPEAVSHPLNTVTEDMY*TNGSPAPGSPAQVK.G      |        | 3     | 4.8889 | 0.3284 | 55 KDA ERYTHROCYTE MEMBRANE PROTEIN.                                                                                                                                                                             |
| R.SSAQLQTNYPSSDNSLY*TNAK.G                 |        | 2     | 3.8741 | 0.2945 | SPLICE ISOFORM 1 OF MAX PROTEIN.                                                                                                                                                                                 |
| R.SSESSCGVDGDY*EDAELNPR.F                  |        | 2     | 5.0924 | 0.4108 | BREAKPOINT CLUSTER REGION ISOFORM 2 .                                                                                                                                                                            |
| R.SSGPYGGGGQY*FAKPR.N                      |        | 2     | 3.2806 | 0.3617 | PREDICTED: SIMILAR TO HETEROGENEOUS NUCLEAR RIBONUCLEO-<br>PROTEIN A1 (HELIX-DESTABILIZING PROTEIN) (SINGLE-STRAND BINDING PROTEIN)<br>(HNRNP CORE PROTEIN A1) (HDP-1)<br>(TOPOISOMERASE-INHIBITOR SUPPRESSED) . |
| R.SSTQMNSYSDSGY*QEAGSFHNSQNVSK.A           |        | 3     | 4.2349 | 0.334  | SPLICE ISOFORM LONG OF PLAKOPHILIN 4.                                                                                                                                                                            |
| R.STLGDAEASDPPPPY*SDFHPNNQESTLSHSR.M       |        | 3     | 3.3897 | 0.2823 | KIAA0157 PROTEIN.                                                                                                                                                                                                |
| R.STLQDSDEY*SNPAPLPLDQHSR.K                |        | 3     | 4.4019 | 0.3685 | LEUPAXIN.                                                                                                                                                                                                        |
| R.STLQDSDEY*SNPAPLPLDQHSRK.E               |        | 3     | 5.0178 | 0.4774 | LEUPAXIN.                                                                                                                                                                                                        |
| R.STSTLY*SQFQTAESNR.S                      |        | 2     | 4.764  | 0.4247 | SPLICE ISOFORM 3 OF SET BINDING FACTOR 1.                                                                                                                                                                        |
| R.SVDGDQGLGMEGPY*EVLK.D                    |        | 2     | 3.7459 | 0.2729 | HYPOTHETICAL PROTEIN FLJ20673.                                                                                                                                                                                   |
| R.TAIY*CLTQNEW.R                           |        | 2     | 2.6551 | 0.256  | HYPOTHETICAL PROTEIN FLJ10704.                                                                                                                                                                                   |
| R.TDFY*CLVSKDDM.-                          |        | 2     | 2.7314 | 0.1854 | HYPOTHETICAL PROTEIN FLJ21446.                                                                                                                                                                                   |
| R.TEDSIRDY*EDGMEVDTTPTVAGQFEDADVDH.-       |        | 3     | 6.3575 | 0.2836 | METHYLOSOME SUBUNIT PICLN.                                                                                                                                                                                       |
| R.TFDQNEELGLNDMKTEGY*EAGLAPQR.-            |        | 3     | 5.3884 | 0.374  | ZINC-FINGER PROTEIN ZPR1.                                                                                                                                                                                        |
| R.TGEEDKKINEELESQY*QQSMDSK.L               |        | 3     | 5.1065 | 0.2408 | SMALL ACIDIC PROTEIN.                                                                                                                                                                                            |
| R.TGY*ESGEYEMLGEGLVK.E                     |        | 2     | 3.8989 | 0.2303 | 45 KDA PROTEIN.                                                                                                                                                                                                  |
| R.TGY*ESGEYEMLGEGLVKQK.Y                   |        | 3     | 3.3645 | 0.2254 | DYNACTIN COMPLEX 50 KDA SUBUNIT.                                                                                                                                                                                 |
| R.TGYESGEY*EMLGEGLVK.E                     |        | 2     | 5.1557 | 0.2438 | 45 KDA PROTEIN.                                                                                                                                                                                                  |
| R.TGYESGEY*EMLGEGLVKQK.Y                   |        | 3     | 4.5465 | 0.26   | DYNACTIN COMPLEX 50 KDA SUBUNIT.                                                                                                                                                                                 |
| R.THVESCCEETY*ETLDHGSEPR.C                 |        | 3     | 3.9026 | 0.1544 | NOVEL PROTEIN.                                                                                                                                                                                                   |
| R.TIKETDPDY*EDVSVALPNKR.H                  |        | 3     | 3.3771 | 0.1899 | YEATS DOMAIN CONTAINING 2 .                                                                                                                                                                                      |
| R.TKGDEEY*WNSSKFK.A                        |        | 3     | 4.5798 | 0.3983 | SPLICE ISOFORM 1 OF PROTEIN C14ORF133.                                                                                                                                                                           |
| R.TKKPDLQIY*QPGR.L                         |        | 3     | 3.6489 | 0.1657 | SPLICE ISOFORM 1 OF TELOMERASE-BINDING PROTEIN EST1A.                                                                                                                                                            |
| R.TMSVDFNY*SR.T                            |        | 2     | 3.258  | 0.2026 | SPLICE ISOFORM 3 OF LAP2 PROTEIN.                                                                                                                                                                                |
| R.TPMY*GSQTPLQDGR.T                        |        | 2     | 4.0043 | 0.3818 | SUPT5H PROTEIN.                                                                                                                                                                                                  |
| R.TPYEAY*DPIGK.Y                           |        | 2     | 3.3432 | 0.1473 | SPLICE ISOFORM 3 OF KIN OF IRRE-LIKE PROTEIN 1 PRECURSOR.                                                                                                                                                        |
| R.TQTCTEGGDY*CLIPR.T                       |        | 2     | 4.2642 | 0.3422 | NOVEL PROTEIN.                                                                                                                                                                                                   |
| R.TSAGSY*SSPPPAPYSAPQAPALSVTGPITANSEQIAR.L |        | 3     | 5.2276 | 0.2196 | TARGET OF MYB1-LIKE PROTEIN 2.                                                                                                                                                                                   |
| R.TSAGSYSSPPPAPY*SAPQAPALSVTGPITANSEQIAR.L |        | 3     | 4.0794 | 0.233  | TARGET OF MYB1-LIKE PROTEIN 2.                                                                                                                                                                                   |
| R.TSPSDGAMANY*ESTVEMGDGESAHDSR.D           |        | 3     | 3.9769 | 0.3495 | VACUOLAR SORTING PROTEIN 9 DOMAIN CONTAINING PROTEIN.                                                                                                                                                            |
| R.TTPSY*VAFTDTER.L                         |        | 2     | 2.5937 | 0.1823 | SPLICE ISOFORM 1 OF HEAT SHOCK COGNATE 71 KDA PROTEIN.                                                                                                                                                           |

**SUPPLEMENTAL TABLE 1: Unique pY Peptides**

| PeptideSequence                      | Charge |        |        | Description                                                            |
|--------------------------------------|--------|--------|--------|------------------------------------------------------------------------|
|                                      | State  | XCorr  | DelCN  |                                                                        |
| R.TTSQLY*DAVPIQSSVVLCSPPSMVR.T       | 3      | 4.2414 | 0.4097 | PDPK1 PROTEIN.                                                         |
| R.TVAISDAAQLPHDY*CTTPGGTLFSTTPGGTR.I | 3      | 4.35   | 0.1694 | EUKARYOTIC TRANSLATION INITIATION FACTOR 4E BINDING PROTEIN 2.         |
| R.TYASGY*AHYEEQEN.-                  | 2      | 2.5239 | 0.1159 | ZINC FINGER PROTEIN 330.                                               |
| R.TYASGYAHY*EEQEN.-                  | 2      | 3.5572 | 0.2905 | ZINC FINGER PROTEIN 330.                                               |
| R.VADLTEQYNEQY*GAVR.T                | 2      | 5.6762 | 0.3085 | HLARK.                                                                 |
| R.VADPDHDHTGFLTEY*VATR.W             | 3      | 4.9116 | 0.2985 | MITOGEN-ACTIVATED PROTEIN KINASE 1 .                                   |
| R.VALENDRSEEEKY*TAVQR.N              | 3      | 3.3655 | 0.1671 | SPLICE ISOFORM 1 OF ATAXIN-2.                                          |
| R.VAQGIREEEVSY*QLAFNKQELR.K          | 3      | 4.8949 | 0.1893 | SPLICE ISOFORM 2 OF EXOCYST COMPLEX COMPONENT SEC3.                    |
| R.VCEPCY*EQLNR.K                     | 2      | 3.4493 | 0.1636 | HRS PROTEIN.                                                           |
| R.VEEFLY*EKLDL.R                     | 2      | 3.0657 | 0.3    | SPLICE ISOFORM 1 OF SH3 DOMAIN GRB2-LIKE PROTEIN B2.                   |
| R.VEKY*TISQEAQDQR.Q                  | 2      | 3.7948 | 0.2933 | TUBULIN-SPECIFIC CHAPERONE B.                                          |
| R.VFDKDGNGY*ISAAELR.H                | 3      | 4.0912 | 0.2578 | CALMODULIN.                                                            |
| R.VGEEHVY*SFPNK.Q                    | 2      | 3.8635 | 0.2762 | SPLICE ISOFORM BETA OF PAXILLIN.                                       |
| R.VGEEHVY*SFPNKQK.S                  | 3      | 3.5137 | 0.157  | SPLICE ISOFORM ALPHA OF PAXILLIN.                                      |
| R.VGFQYEGTY*K.W                      | 2      | 2.786  | 0.1406 | SPLICE ISOFORM LONG OF GLUCOSE-6-PHOSPHATE 1-DEHYDROGENASE.            |
| R.VIQPHGGGNSPLEGTQHLQDVPY*VMVR.E     | 3      | 4.0839 | 0.1955 | DESMOGLEIN-2 PRECURSOR.                                                |
| R.VITNQY*NNPAGLYSSENISNFNALESK.T     | 3      | 6.0617 | 0.2412 | PDZ AND LIM DOMAIN PROTEIN 1.                                          |
| R.VITNQYNNPAGLY*SSENISNFNALESK.T     | 3      | 5.8021 | 0.1785 | PDZ AND LIM DOMAIN PROTEIN 1.                                          |
| R.VKEEGY*ELPYNPATDDY*AVPPPR.S        | 3      | 3.74   | 0.1448 | SPLICE ISOFORM 1 OF DOCKING PROTEIN 1.                                 |
| R.VKEEGYELPY*NPATDDY*AVPPPR.S        | 3      | 3.5264 | 0.2871 | SPLICE ISOFORM 1 OF DOCKING PROTEIN 1.                                 |
| R.VKEEGYELPYNPATDDY*AVPPPR.S         | 3      | 3.5457 | 0.193  | SPLICE ISOFORM 1 OF DOCKING PROTEIN 1.                                 |
| R.VKEGYVPQEEVPVY*ENKY*VK.F           | 3      | 4.4934 | 0.1604 | PYM PROTEIN.                                                           |
| R.VKEGYVPQEEVPVYENKY*VK.F            | 3      | 3.3857 | 0.1924 | HYPOTHETICAL PROTEIN FLJ39603.                                         |
| R.VQGGVPAGSDEY*EDECPLIALSSLNR.E      | 3      | 4.0187 | 0.2123 | SERINE/THREONINE-PROTEIN KINASE RIO2.                                  |
| R.VSLEEIY*SGCTK.R                    | 2      | 3.7255 | 0.2995 | DNAJ HOMOLOG SUBFAMILY B MEMBER 4.                                     |
| R.VSLEEIY*SGCTKK.M                   | 2      | 2.91   | 0.1519 | DNAJ HOMOLOG SUBFAMILY B MEMBER 1.                                     |
| R.VTPPEGY*EVVTVFPK.-                 | 2      | 2.7559 | 0.3394 | PDZ AND LIM DOMAIN PROTEIN 1.                                          |
| R.VY*FQSPPGAAGEGPGGADDEGPVRR.Q       | 3      | 4.2108 | 0.4029 | PREDICTED: PROTEIN PHOSPHATASE 1, REGULATORY (INHIBITOR) SUBUNIT 14B . |
| R.WEQGQADY*MGADSFNKR.K               | 3      | 4.146  | 0.4166 | GLYCOGENIN .                                                           |
| R.WQPDTEEEY*EDSSGNVVKK.T             | 2      | 3.44   | 0.2398 | SPLICING FACTOR 3A SUBUNIT 3.                                          |
| R.Y*GNIIAY*DHSR.V                    | 2      | 3.155  | 0.1992 | RECEPTOR-TYPE TYROSINE-PROTEIN PHOSPHATASE MU PRECURSOR.               |
| R.Y*TEFYHVPTSDASK.K                  | 2      | 3.4541 | 0.2702 | PDZ AND LIM DOMAIN 5 ISOFORM B .                                       |
| R.Y*YDSRPGGYGYGR.S                   | 2      | 3.0189 | 0.2329 | PUTATIVE RNA-BINDING PROTEIN 3.                                        |
| R.Y*YEGYAAAGPGYGGR.N                 | 2      | 4.1677 | 0.362  | LPP.                                                                   |
| R.YALY*DATYETK.E                     | 2      | 3.0937 | 0.1384 | SPLICE ISOFORM CFL2B OF COFILIN, MUSCLE ISOFORM.                       |
| R.YALYDATY*ETK.E                     | 2      | 3.0537 | 0.2525 | COFILIN, NON-MUSCLE ISOFORM.                                           |

**SUPPLEMENTAL TABLE 1: Unique pY Peptides**

| PeptideSequence               | Charge | State | XCorr  | DelCN  | Description                                                        |
|-------------------------------|--------|-------|--------|--------|--------------------------------------------------------------------|
| R.YGDFRADDADDFGY*SR.-         |        | 3     | 4.3683 | 0.242  | STAPHYLOCOCCAL NUCLEASE DOMAIN CONTAINING PROTEIN 1.               |
| R.YGMNPHQTPAQLY*TLQPK.L       |        | 3     | 4.0489 | 0.2029 | BIFUNCTIONAL PURINE BIOSYNTHESIS PROTEIN PURH.                     |
| R.YGNIIAY*DHSR.V              |        | 2     | 3.1716 | 0.2089 | OTTHUMP00000017184 (FRAGMENT).                                     |
| R.YIEDEDY*Y*KASVTRLPIK.W      |        | 3     | 3.9824 | 0.1946 | SPLICE ISOFORM 1 OF PROTEIN TYROSINE KINASE 2 BETA.                |
| R.YLCEGTESPY*QTGQLHPAIR.V     |        | 3     | 3.3796 | 0.3082 | RECEPTOR-TYPE TYROSINE-PROTEIN PHOSPHATASE KAPPA PRECURSOR.        |
| R.YNMERDINSLY*DVS.R.M         |        | 3     | 3.3346 | 0.12   | 1-PHOSPHATIDYLINOSITOL-4,5-BISPHOSPHATE PHOSPHODIESTERASE GAMMA 2. |
| R.YTEFY*HVPTHSDASK.K          |        | 2     | 2.8386 | 0.1019 | ENIGMA HOMOLOG.                                                    |
| R.YY*DSRPGGYGYGR.S            |        | 3     | 3.6044 | 0.3801 | PUTATIVE RNA-BINDING PROTEIN 3.                                    |
| R.YY*EGYYAAGPGYGGR.N          |        | 3     | 3.8074 | 0.1058 | LPP.                                                               |
| R.YYDSRPGGY*GYGR.S            |        | 2     | 2.7983 | 0.3437 | PUTATIVE RNA-BINDING PROTEIN 3.                                    |
| R.YYDSRPGGYGY*GYGR.S          |        | 2     | 2.8528 | 0.2667 | PUTATIVE RNA-BINDING PROTEIN 3.                                    |
| R.YYDSRPGGYGYGY*GR.S          |        | 2     | 2.929  | 0.1923 | PUTATIVE RNA-BINDING PROTEIN 3.                                    |
| R.YYEGY*YAAGPGYGGR.N          |        | 2     | 2.3001 | 0.1283 | LPP.                                                               |
| R.YYEGYY*AAGPGYGGR.N          |        | 2     | 5.0341 | 0.1623 | LPP.                                                               |
| S.KTSQPEDLTDGSY*DDVLNAEQLQK.L |        | 3     | 4.9669 | 0.3012 | HYPOTHETICAL PROTEIN PSEC0198.                                     |
| Y.TIQGQY*AIPQDLTK.L           |        | 2     | 4.2081 | 0.4272 | POLY(RC)-BINDING PROTEIN 2 ISOFORM B .                             |
